# Supplementary material for: Appropriate exercise level attenuates gut dysbiosis and valeric acid increase to improve neuroplasticity and cognitive function after surgery in mice
Source: PubMed Central journal article supplement (PMC8873004; doi:10.1038/s41380-021-01291-y), 2021-10-18
Supplement: 41380_2021_1291_MOESM1_ESM.pdf [file 41380_2021_1291_MOESM1_ESM.pdf]

**Appropriate exercise level attenuates gut dysbiosis and valeric acid increase to improve neuroplasticity and cognitive function after surgery in mice**

Zhongmeng Lai, Weiran Shan, Jun Li, Jia Min, Xianzhang Zeng, Zhiyi Zuo

**KEY RESOURCES TABLE**

| <b>REAGENT or RESOURCE</b>                                      | <b>RESOURCE</b>           | <b>IDENTIFIER</b>       |
|-----------------------------------------------------------------|---------------------------|-------------------------|
| <b>Antibodies</b>                                               |                           |                         |
| Rabbit polyclonal anti-PSD95                                    | Abcam                     | Cat#GR326885-1          |
| Rabbit polyclonal anti- Synapsin 1                              | Abcam                     | Cat#GR3275672-2         |
| alpha-Tubulin rabbit Ab                                         | cell signaling Technology | Cat#2144S               |
| Rabbit monoclonal anti-C3 antibody                              | Abcam                     | Cat#GR3273564-7         |
| Goat monoclonal anti-GFAP antibody                              | Millipore                 | Cat#GR3313543-1         |
| Rat monoclonal anti-C3ar antibody                               | Hycult Biotech            | Cat#HM1123-27428M0819-A |
| Rabbit monoclonal anti-Iba-1 antibody                           | Wako Chemical Co.         | Cat#019-19741           |
| Rat monoclonal anti-BrdU antibody                               | Abcam                     | Cat#GR3289293-1         |
| Donkey anti-goat IgG antibody conjugated with Alexa Fluor 488   | Invitrogen                | Cat#1463163             |
| Donkey anti-rabbit IgG antibody conjugated with Alexa Fluor 594 | Invitrogen                | Cat#1987293             |
| Donkey anti-rat IgG antibody conjugated with Alexa Fluor 594    | Invitrogen                | Cat#1979379             |
| Donkey anti-rabbit IgG antibody conjugated with Alexa Fluor 647 | Invitrogen                | Cat#1826679?            |
| Hoechst 33342                                                   | Thermo Scientific         | Cat#U12842162           |
| <b>Drugs</b>                                                    |                           |                         |
| Amoxicillin/Clavulanic acid                                     | Sigma-Aldrich             | Cat#SM800607            |
| Metronidazole                                                   | Sigma-Aldrich             | Cat#M3761               |
| Cefazolin                                                       | West-Ward                 | Cat#319033.1            |

|                |                               |             |
|----------------|-------------------------------|-------------|
| Valeric sodium | Toronto Research<br>Chemicals | Cat#V091420 |
|----------------|-------------------------------|-------------|

---

**Critical Commercial Assays**


---

|                               |                                 |                 |
|-------------------------------|---------------------------------|-----------------|
| Nylon cell strainer           | Fisher Scientific               | Cat#08-771-2    |
| RNeasy Micro kit              | QIAGEN                          | Cat#74004       |
| 5X All in-One MasterMix       | Applied Biological<br>Materials | Cat#G485        |
| NovaSeq 6000 S4 Reagent kit   | Illumina                        | Cat#20012866    |
| DNA isolation kit             | QIAGEN                          | Cat#12855-100   |
| AMPure XP magnetic beads      | Beckman Coulter                 | Cat#A63881      |
| Nextera XT Index Kit          | Illumina                        | Cat#FC-131-2001 |
| Qubit dsDNA HS assay kit      | Thermo Scientific               | Cat#Q33230      |
| FD Rapid GolgiStain kit       | FD NeuroTechnologies            | Cat#PK401       |
| Mouse IL-1 $\beta$ ELISA kits | R&D SYSTEM                      | Cat#SMLB00C     |
| Mouse IL-6 ELISA kits         | R&D SYSTEM                      | Cat#SM6000B     |
| Mouse C3 ELISA kits           | Abcam                           | Cat#ab263884    |
| Mouse GDNF ELISA kits         | Biosensis                       | Cat#BEK-2229-2P |

---

**Chemicals**


---

|                               |                   |                  |
|-------------------------------|-------------------|------------------|
| Recombinant mouse GDNF        | Abcam             | Cat#GR2862-22    |
| C3ar-agonist                  | cayman chemical   | Cat#21683        |
| C3ar-antagonist               | Sigma-Aldrich     | Cat#559410       |
| BrdU                          | Sigma-Aldrich     | Cat#APN17133-1-1 |
| 9-chloromethylantracene       | TCI America       | Cat#: A5502      |
| 18-Crown-6                    | Sigma-Aldrich     | Cat#: 80833      |
| 2-Ethylbutyric acid           | Millipore Sigma   | Cat# 109959      |
| 10 $\times$ RIPA buffer       | Thermo Scientific | Cat#89901        |
| Protease inhibitor cocktail   | Sigma-Aldrich     | Cat#SRE0055      |
| Tetramethylammonium hydroxide | TCI America       | Cat# T0138       |

---



### Figure legends for supplemental figures

**Fig. S1. Exercise altered gut microbiota.** Nine-week old male mice were with or without exercise for 4 weeks. Presentation of  $\alpha$  diversity is in panels A and B. Presentation of  $\beta$  diversity is in panel C. Bacterial abundance is presented in panel D.  $n = 16$  for all panels. C-S: control mouse samples harvested before surgery, E-ES: exercise mouse samples harvested before surgery.

**Fig. S2. Exercise stabilized gut microbiota after surgery.** Nine-week old male mice with or without exercise for 4 weeks were subjected to left carotid artery exposure (surgery) under isoflurane anesthesia. Presentation of  $\alpha$  diversity is in panels A to D. Presentation of  $\beta$  diversity is in panels E and F.  $n = 8$  for all panels. S: surgery mouse samples harvested just before surgery, SP3: surgery mouse samples harvested on post-surgery day 3, SP7: surgery mouse samples harvested on post-surgery day 7, ES: exercise mouse samples harvested just before surgery, ESP3: exercise mouse samples harvested on post-surgery day 3, ESP7: exercise mouse samples harvested on post-surgery day 7.

**Fig. S3. Antibiotics reduced gut microbiota.** Nine-week old male mice were treated with antibiotics to eliminate their native gut microbiota. A: bacterial DNA concentrations in feces. Presentation of  $\alpha$  diversity is in panels B to D. Presentation of  $\beta$  diversity is in panels E and F. Bacterial abundance is presented in panel G.  $n = 8$  for all panels. C; control, Anti: antibiotics.

**Fig. S4. Transplantation with feces from exercise mice altered gut microbiota.** Nine-week old mice were treated with antibiotics to eliminate their native gut microbiota and then transplanted with feces from exercise mice (ET) or control mice (CT). Presentation of  $\alpha$  diversity is in panels A and B. Presentation of  $\beta$  diversity is in panel C. Bacterial abundance is presented in panel D.  $n = 8$  for all panels.

**Fig. S5. Successful establishment of transplanted gut microbiota.** Nine-week old male mice received transplantation of feces from control mice or mice with surgery. Presentation of  $\alpha$  diversity is in panels A, B and C. Presentation of  $\beta$  diversity is in panels D and E. Bacterial abundance is presented in panel F.  $n = 10$ . CT: control mouse received transplantation of feces from control mice, ST: control mouse received transplantation of feces from surgery mice.

**Fig. S6. Transplantation of gut microbiota from surgery mice induced learning and memory dysfunction.** Nine-week old mice received antibiotic treatment for 7 days (Antibiotic) or transplantation of feces from control mice (Trans-Control) (panels A to C). In another

experiment, nine-week old male mice received transplantation of feces from control mice (Trans-Control) or mice with surgery (Trans-Surgery) (panels D to F). A and D: training sessions of Barnes maze test. B and E: memory assessment of Barnes maze test. C and F: novel object recognition test. Results in panels A and D are mean  $\pm$  S.D. and results in panels B, C, E and F are median  $\pm$  interquartile range with presentation of value of individual mouse (n = 11 – 12 for panels A to C, = 16 – 17 for panels D to F).

**Fig. S7.** *Changes of short chain fatty acids (SCFAs) under various experimental conditions.* Blood and feces were harvested from mice 2 weeks after fecal transplantation (for panels A and D), 7 days after surgery (panel B) or 4 weeks after the onset of exercise protocol (panel C). Results are mean  $\pm$  S.D. (panels A, C, D) with presentation of value of individual mouse or median  $\pm$  interquartile range (panel B) with presentation of value of individual mouse (n = 7 for all panels). Trans-Control: mice transplanted with feces from control mice, Trans-Exe: mice transplanted with feces from exercise mice, Exe: exercise, Sur: surgery, NS: normal saline, Val: valeric acid.

**Fig. S8.** *Intracerebroventricular injection of small dose of valeric acid failed to induce learning and memory dysfunction.* Thirteen-week old male mice received intracerebroventricular injection of normal saline (NS) or valeric acid (Val). A: training sessions of Barnes maze test. B: memory assessment of Barnes maze test. C: novel object recognition test. Results in panel A are mean  $\pm$  S.D. and results in panels B and C are median  $\pm$  interquartile range with presentation of value of individual mouse (n = 14 – 15).

**Fig. S9.** *Exercise via regulating gut microbiota and blood valeric acid concentrations attenuated surgery-induced immune and inflammatory responses.* Hippocampus of 9-week old mice with or without 4-week exercise was harvested at various times after surgery for immunostaining or ELISA. A: representative Iba-1 and C3ar immunostaining images of hippocampus harvested 48 h after surgery. B and C: quantification of Iba-1 and C3ar immunostaining of hippocampus harvested 48 h after surgery. D and E: quantification of C3. F and G: IL-1 $\beta$  quantified by ELISA. H and I: IL-6 quantified by ELISA. Results are mean  $\pm$  S.D. with presentation of value of individual mouse (n = 6 for panels B and C, = 9 for panels D to F and H, = 10 for panels G and I). Trans-Control: mice transplanted with feces from control mice, Trans-Exe: mice transplanted with feces from exercise mice, Exe: exercise, Sur: surgery, NS: normal saline, Val: valeric acid, post: post-surgery.

**Fig. S10.** *Exercise via regulating gut microbiota and blood valeric acid concentrations attenuated surgery-induced decrease of brain cell genesis and dendritic arborization.* Brain of 9-week old mice with or without 4-week exercise was harvested 19 days after surgery for immunostaining or Golgi staining. A: representative GFAP and BrdU immunostaining images of hippocampus. B and C: quantification of GFAP and BrdU positively stained cells in the hippocampus. D and E: representative Golgi staining images of hippocampus. F and G: quantification of intersections among the dendritic branches and spine density in the hippocampus. Results are mean  $\pm$  S.D. with presentation of value of individual mouse (n = 6 for panel B, = 8 for other panels). Trans-Control: mice transplanted with feces from control mice, Trans-Exe: mice transplanted with feces from exercise mice, Exe: exercise, Sur: surgery, NS: normal saline, Val: valeric acid.

**Fig. S11.** *Exercise attenuated surgery-induced reduction of PSD95 and synapsin 1.* Hippocampus was harvested 2 days after surgery for Western blotting. A and B: representative Western blotting images. C and D: quantification of PSD95 and synapsin 1. Result in panel C is median  $\pm$  interquartile range with presentation of value of individual mouse and result in panel D is mean  $\pm$  S.D. with presentation of value of individual mouse (n = 8 for all panels). Trans-Control: mice transplanted with feces from control mice, Trans-Exe: mice transplanted with feces from exercise mice, Exe: exercise, Sur: surgery, Syn-1: synapsin 1.

**Fig. S12.** *Exercise stabilized gut microbiota of mice with surgery in old mice.* Nineteen-month old male mice with or without exercise for 4 weeks were subjected to left carotid artery exposure (surgery) under isoflurane anesthesia. Presentation of  $\alpha$  diversity is in panels A, B, D, E, G, H, J and K. Presentation of  $\beta$  diversity is in panels C, F, I and L. Bacterial abundance is presented in panels M and N. n = 16 for panels A, B, C and M, and = 8 for other panels. OC-OS: old control mouse samples harvested before surgery, OE-OES: old exercise mouse samples harvested before surgery, OS: old surgery mouse samples harvested just before surgery, OSP: old surgery mouse samples harvested on post-surgery day 7, OES: old exercise mouse samples harvested before surgery, OESP: old exercise mouse samples harvested on post-surgery day 7.

**Fig. S13.** *Exercise attenuated surgery-induced reduction of PSD95 and synapsin 1 in old mice.* Hippocampus was harvested 2 days after surgery for Western blotting. A: representative Western blotting images. B: quantification of PSD95 and synapsin 1. Results are mean  $\pm$  S.D.

with presentation of value of individual mouse ( $n = 8$ ). Exe: exercise, Sur: surgery, Syn-1: synapsin 1.

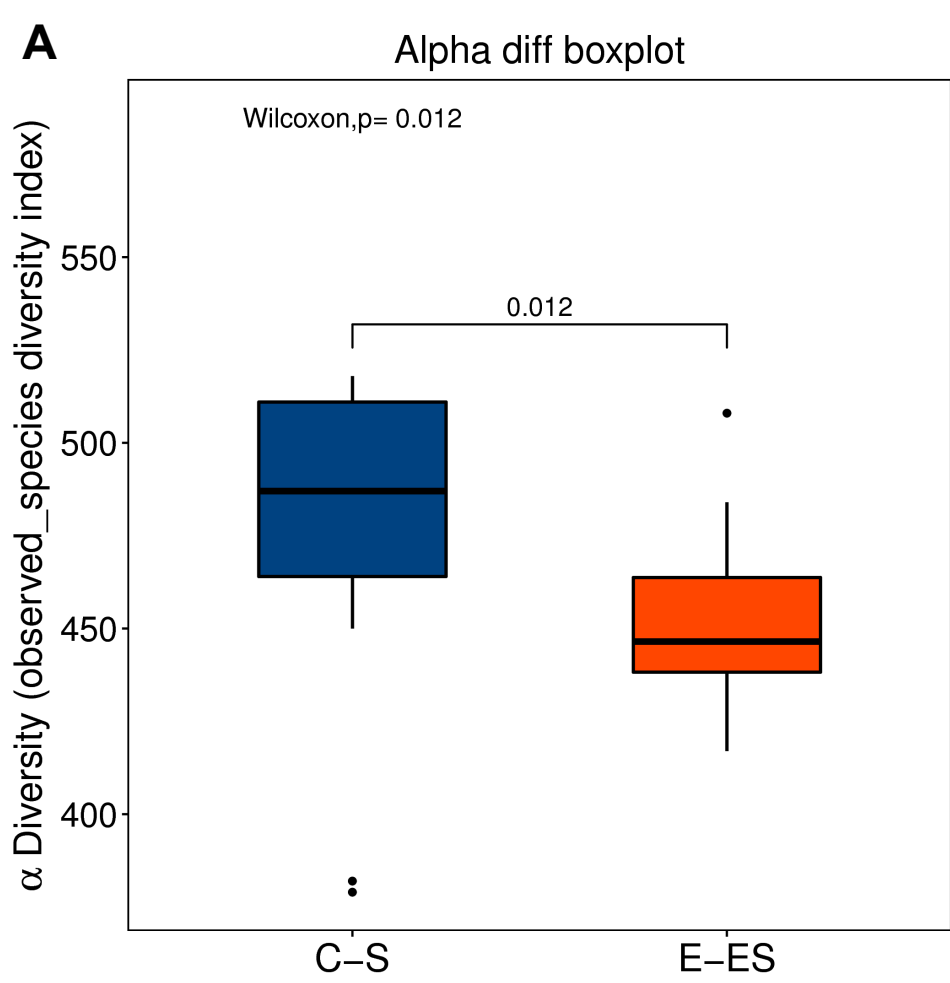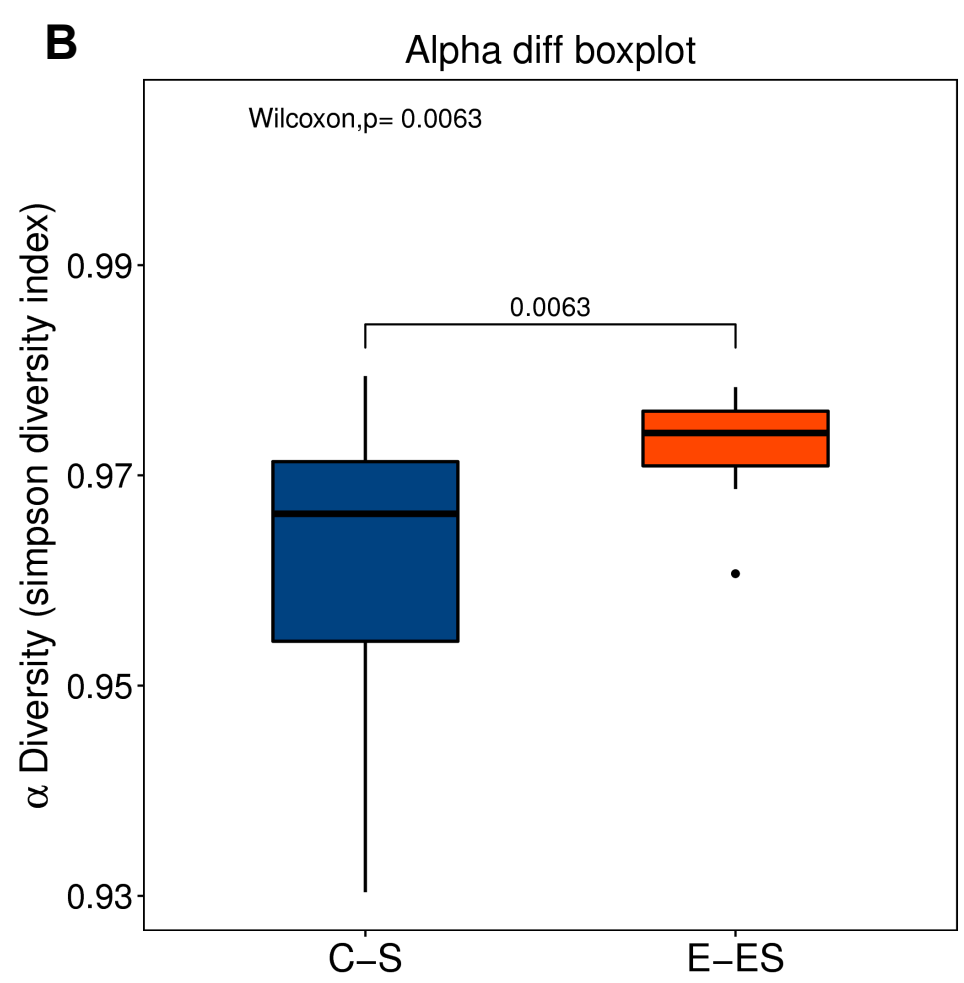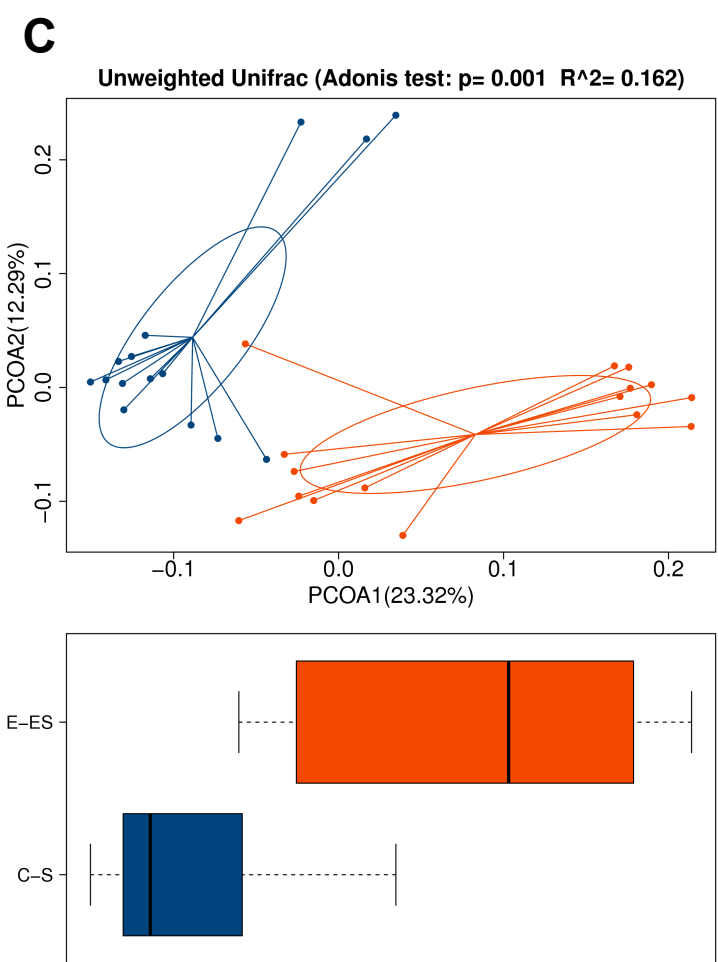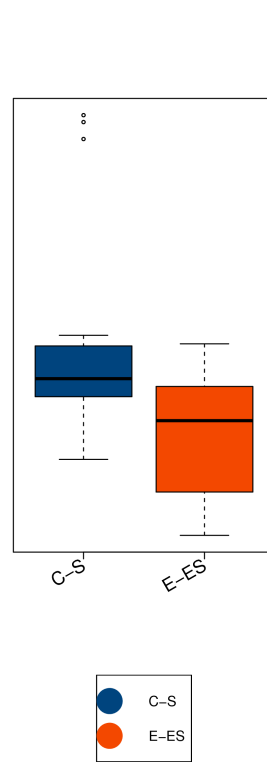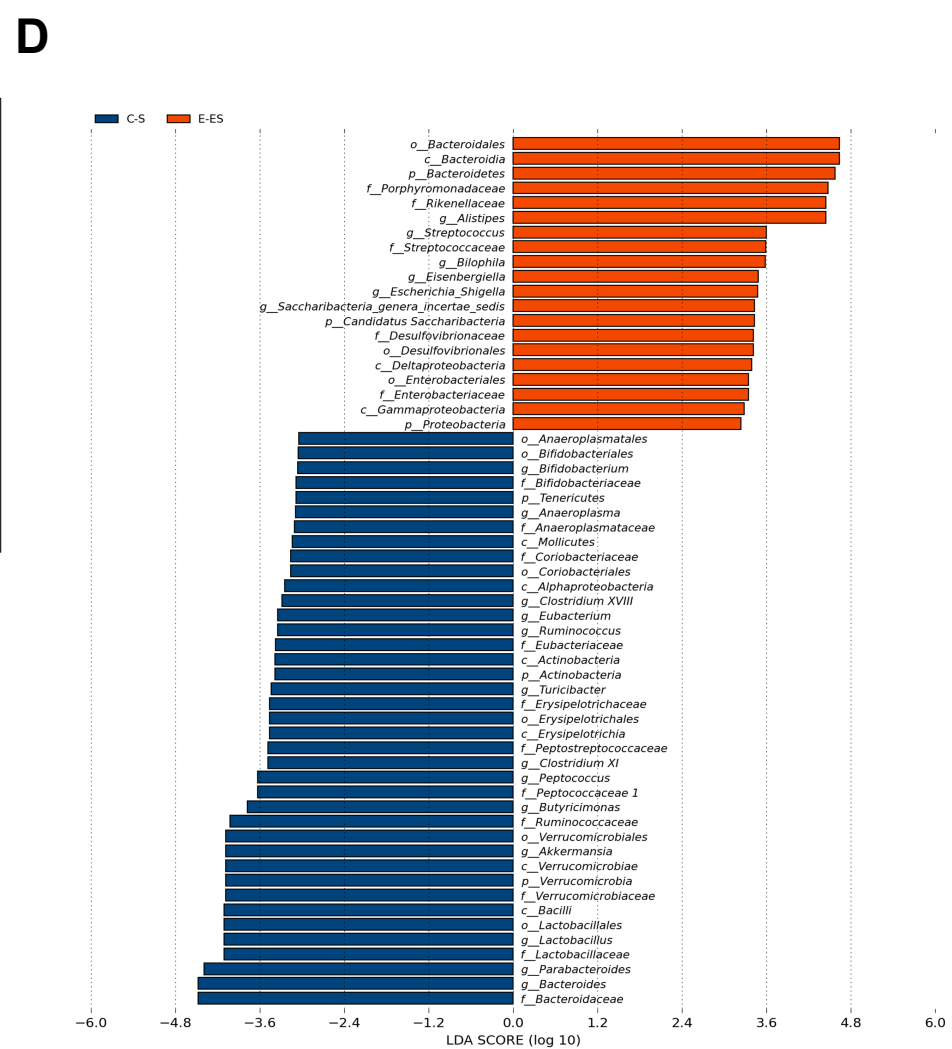

Fig. S1

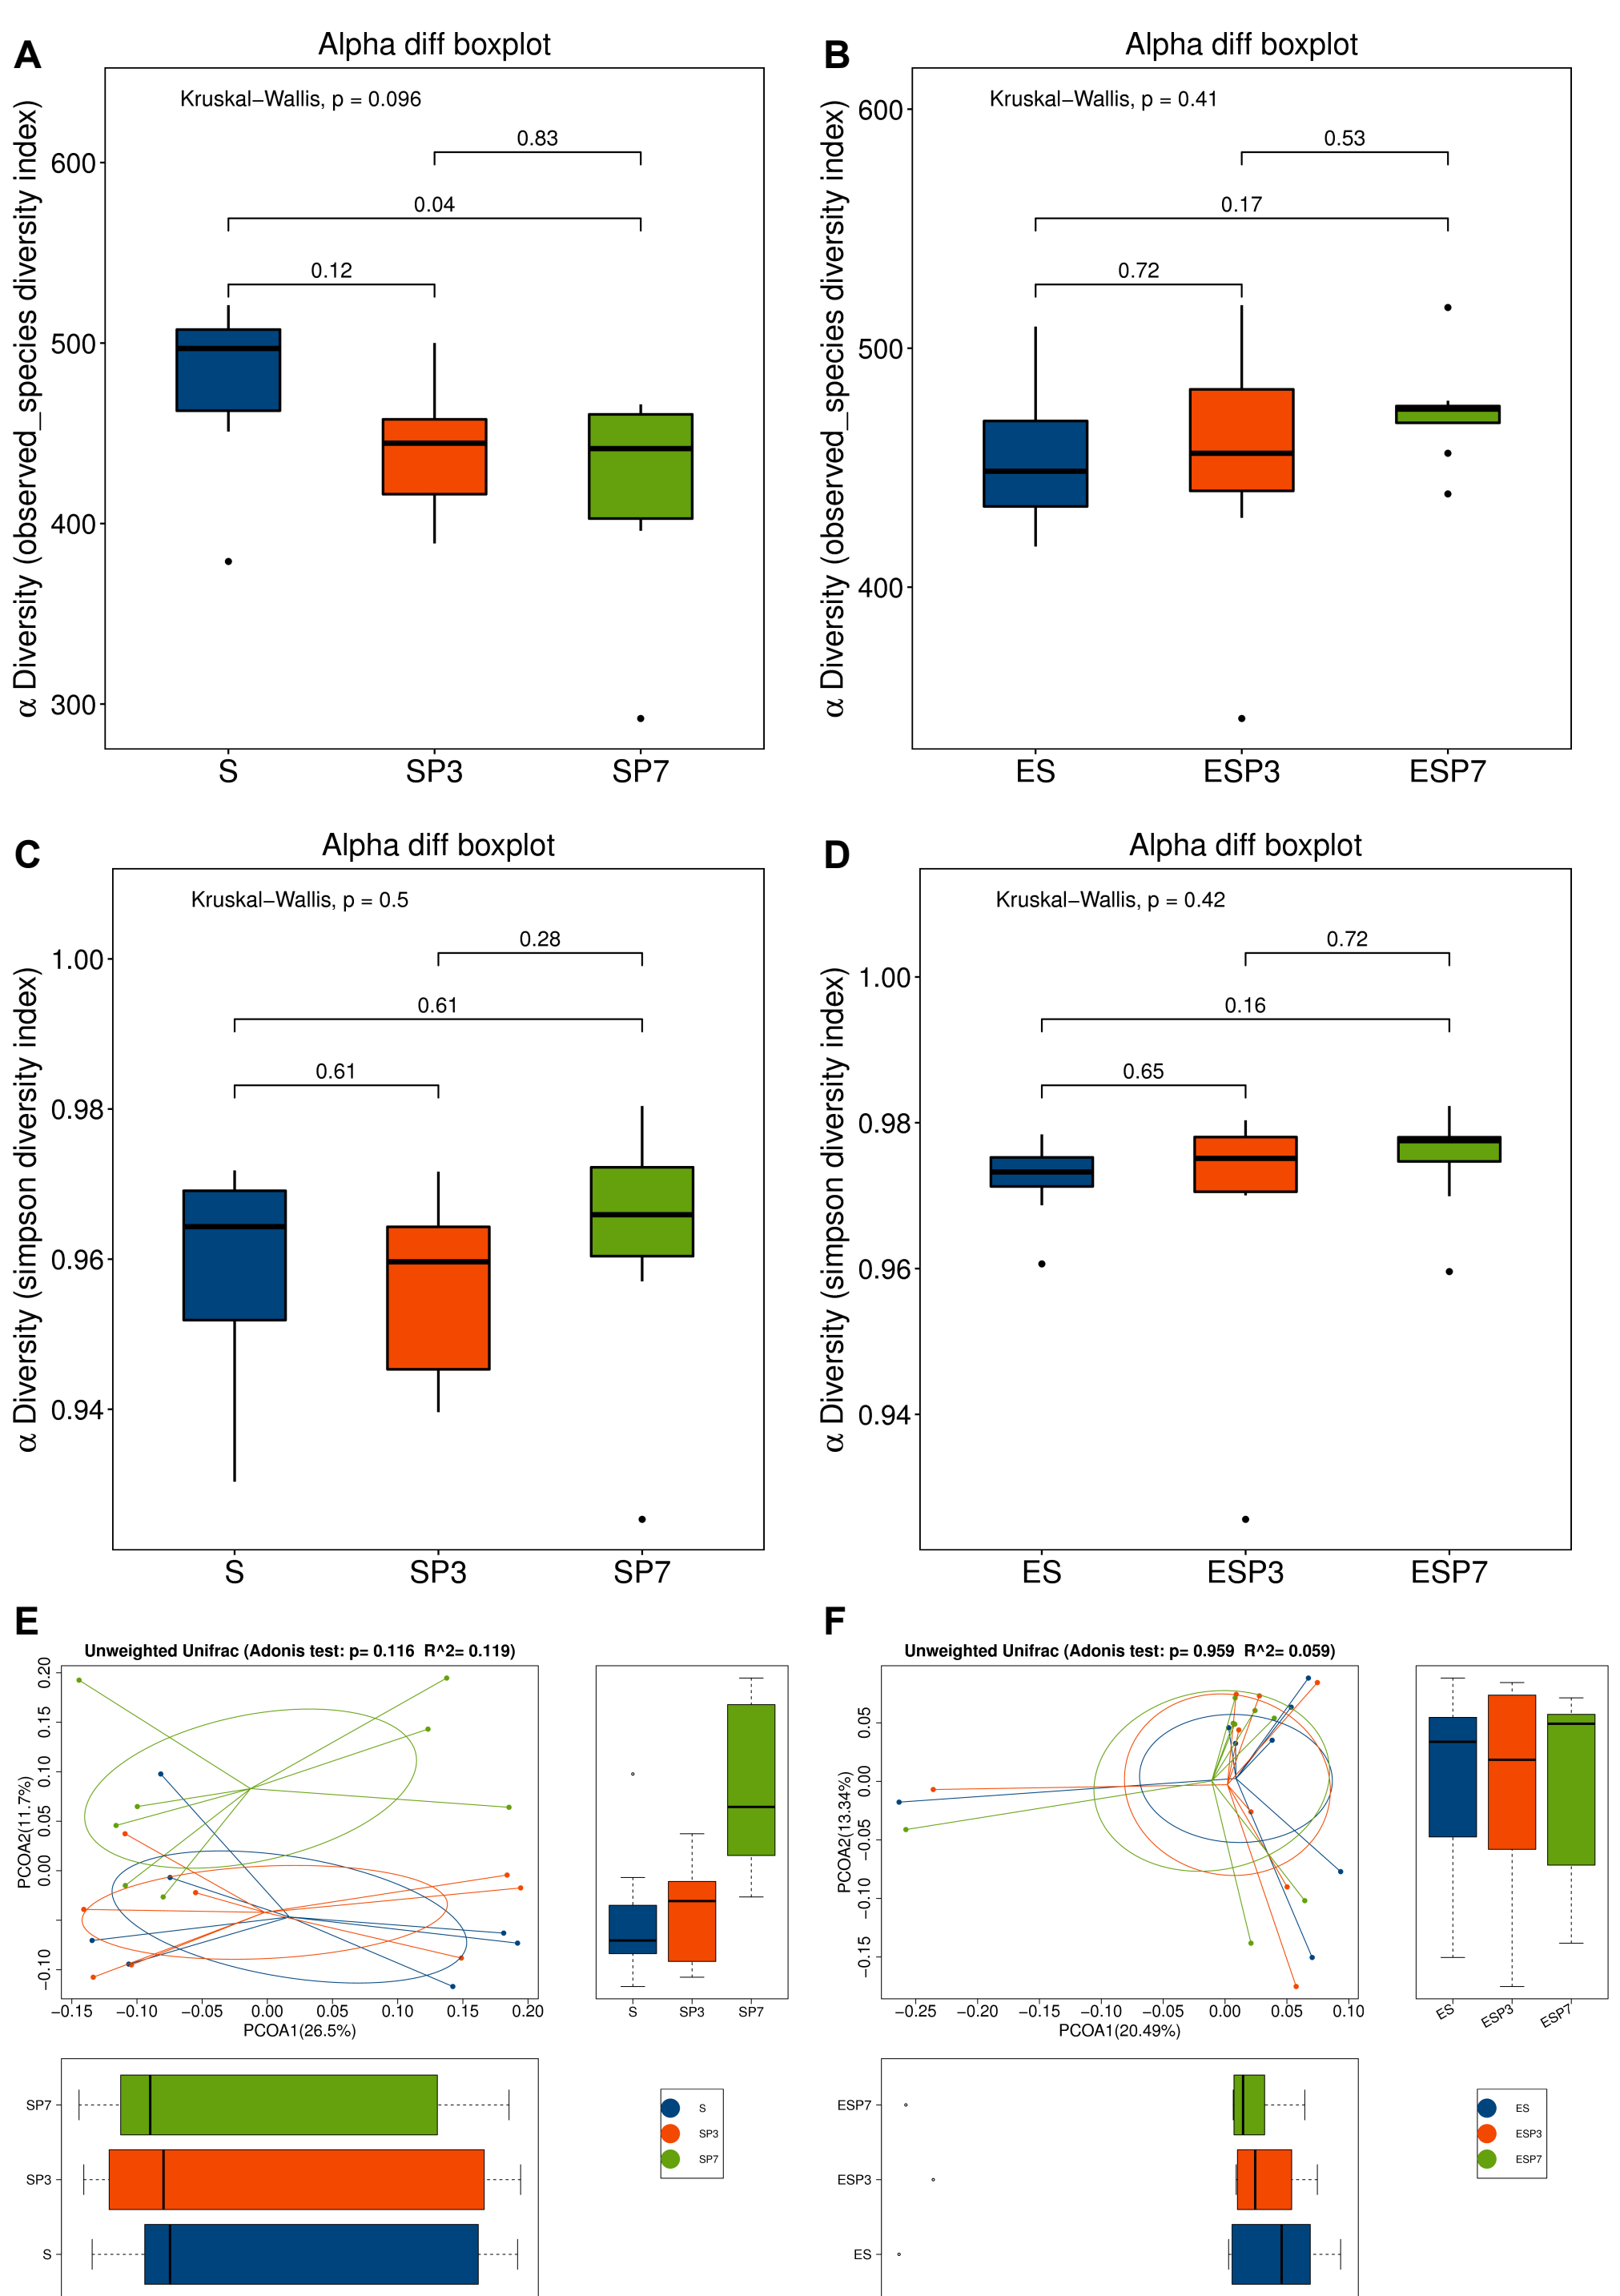

Fig. S2

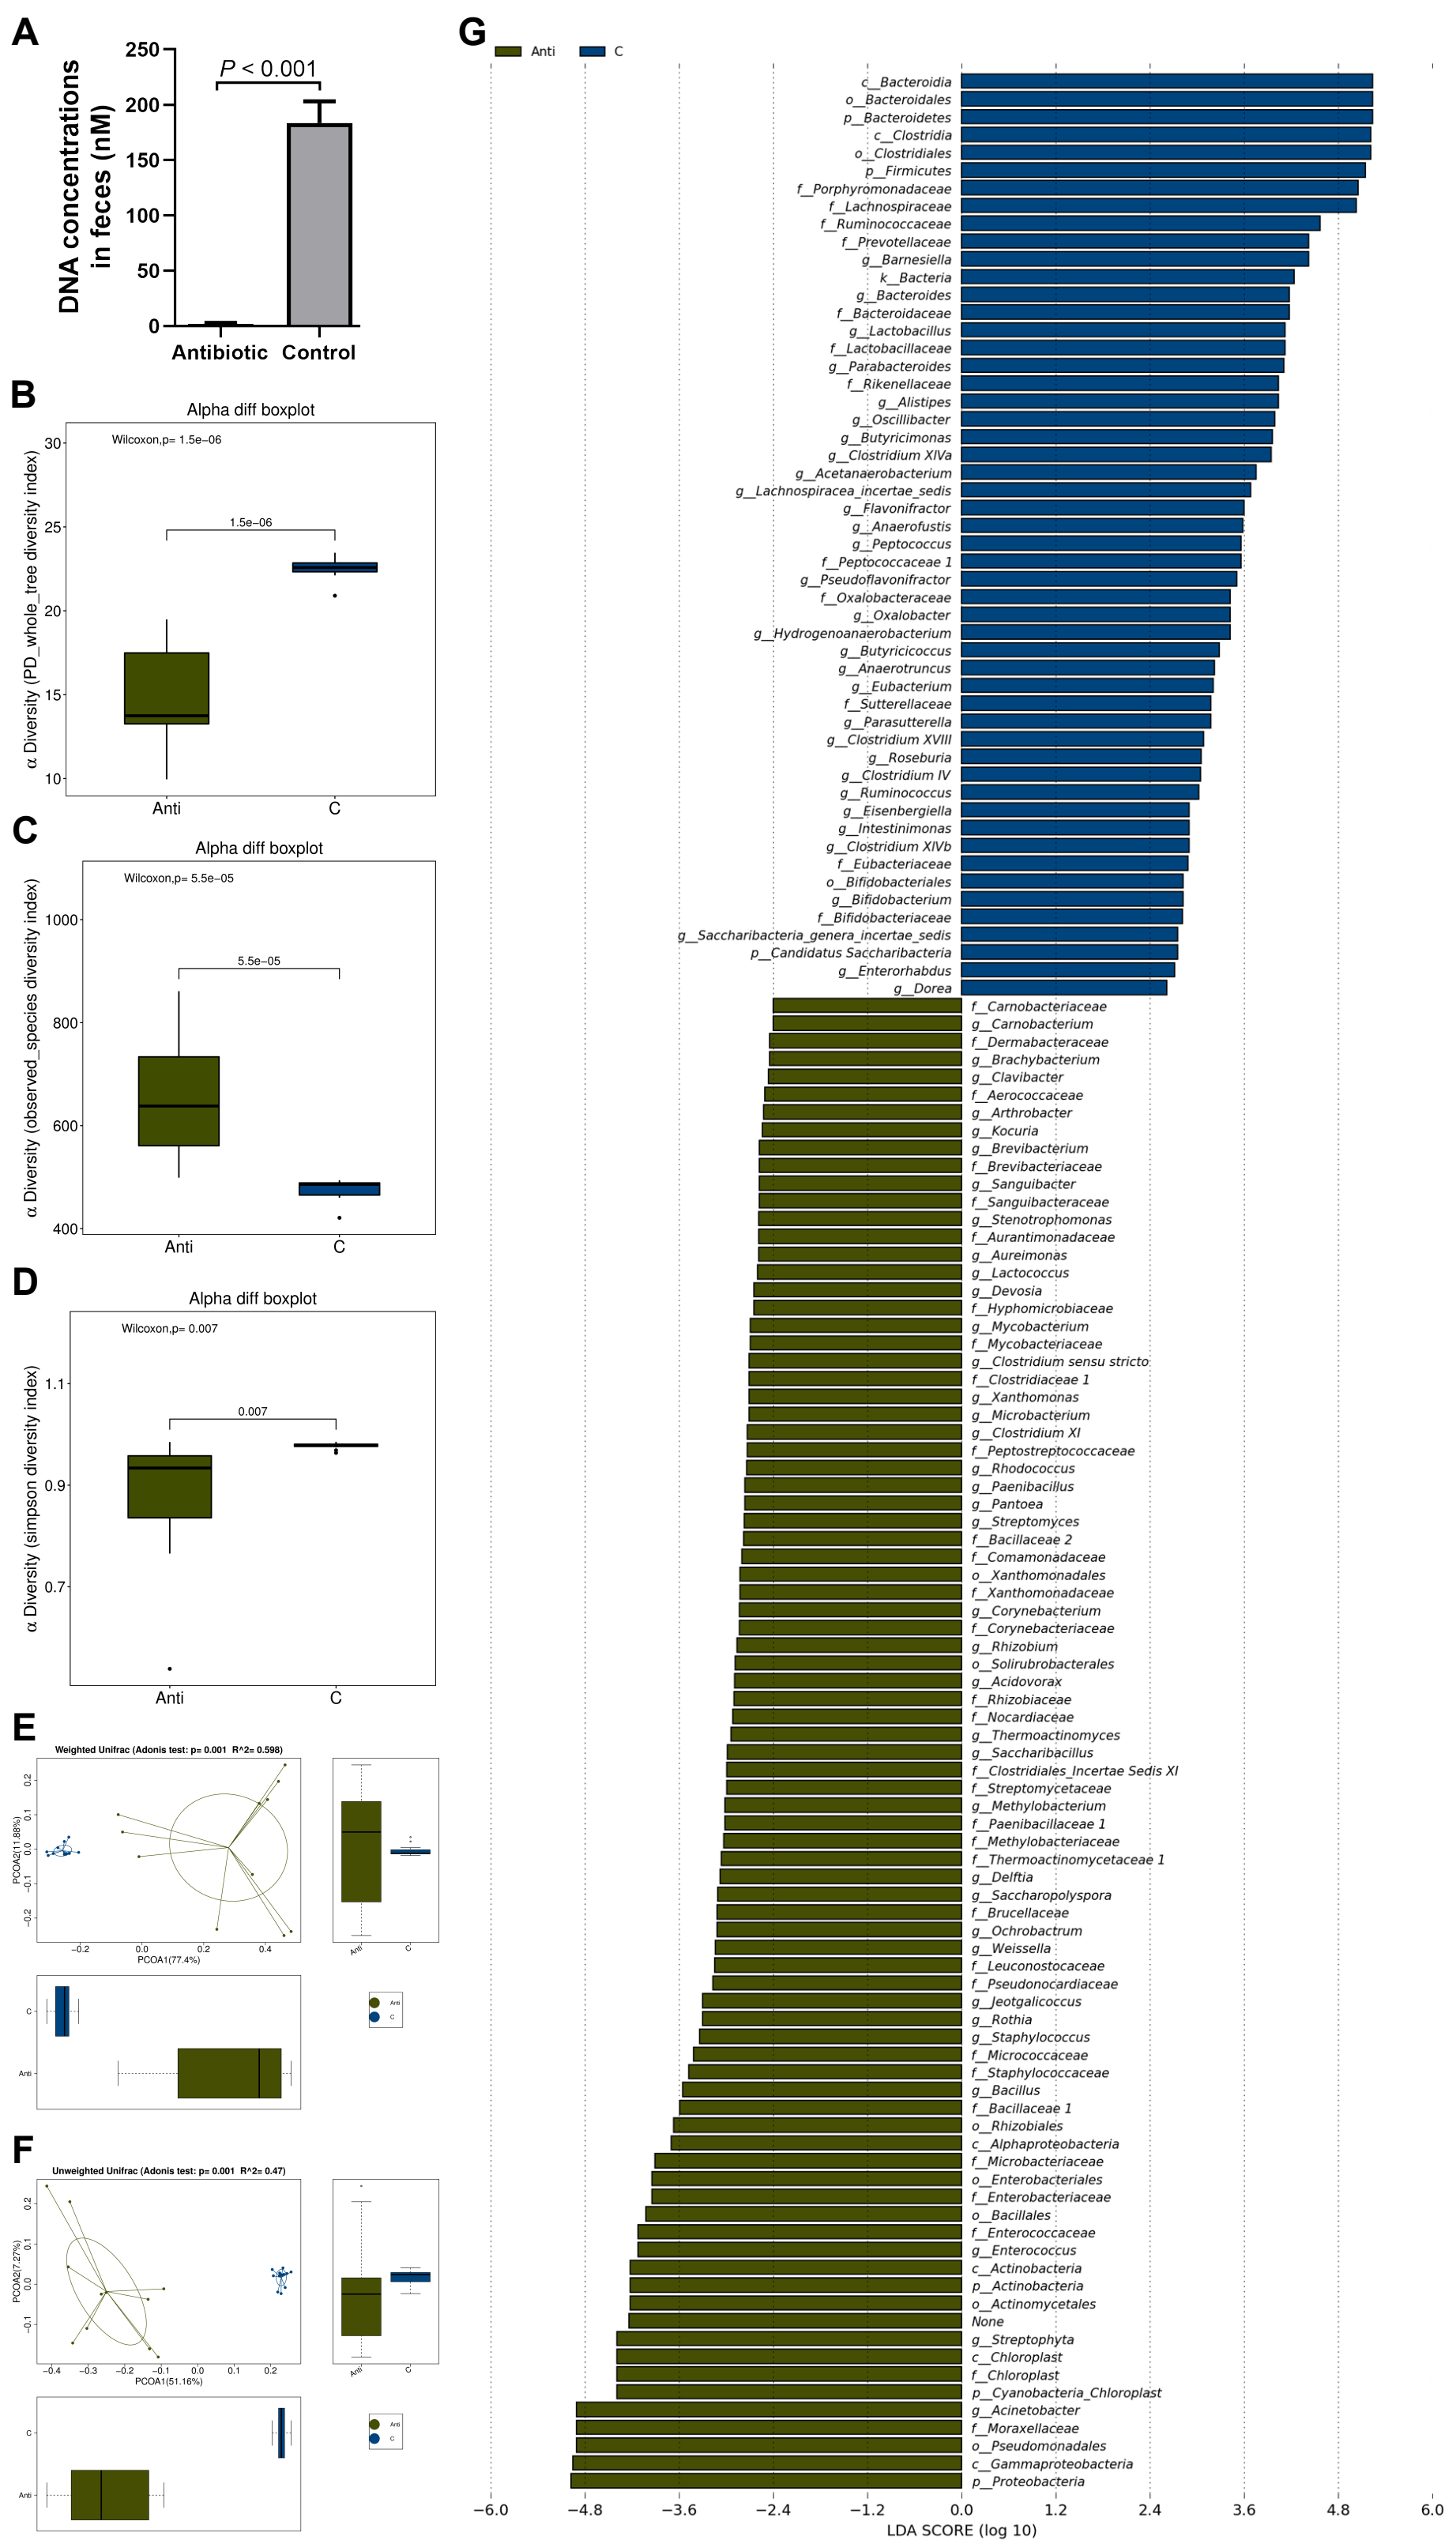

Fig. S3

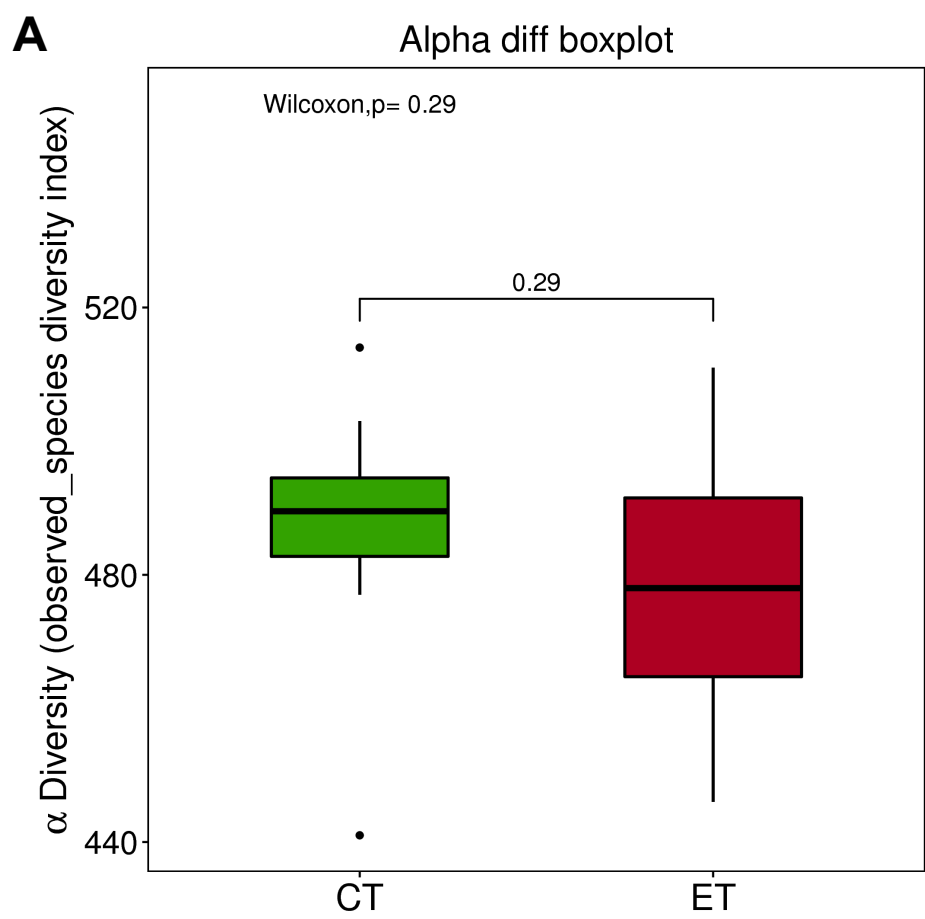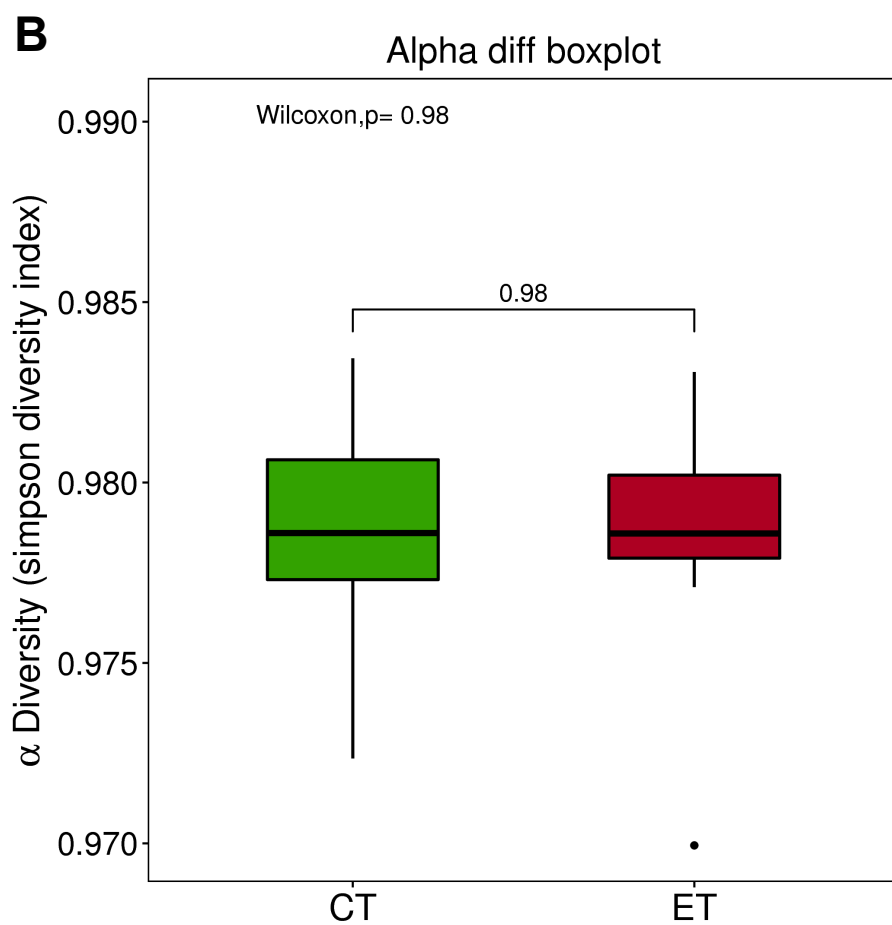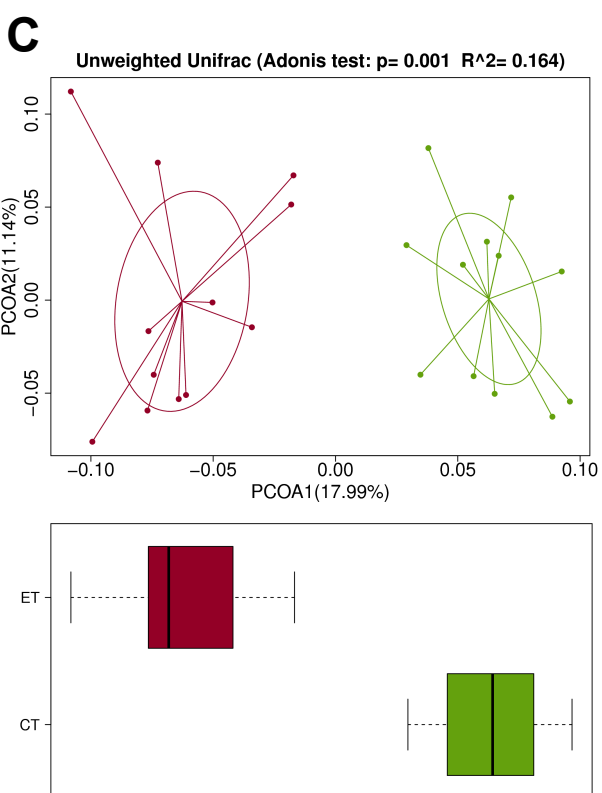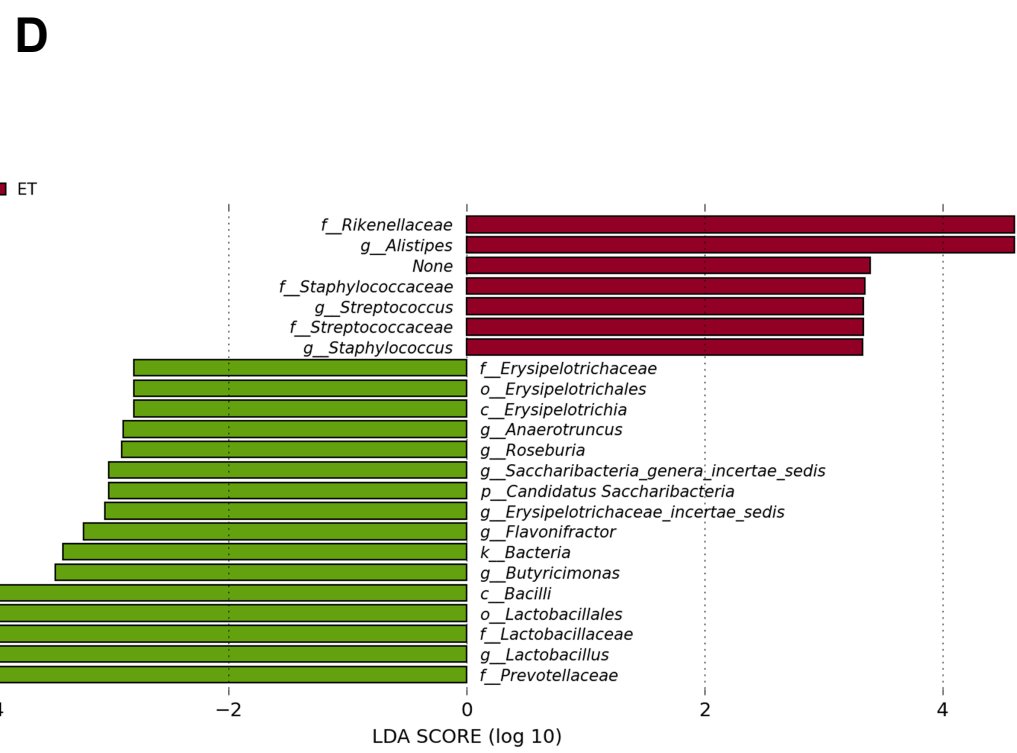

Fig. S4



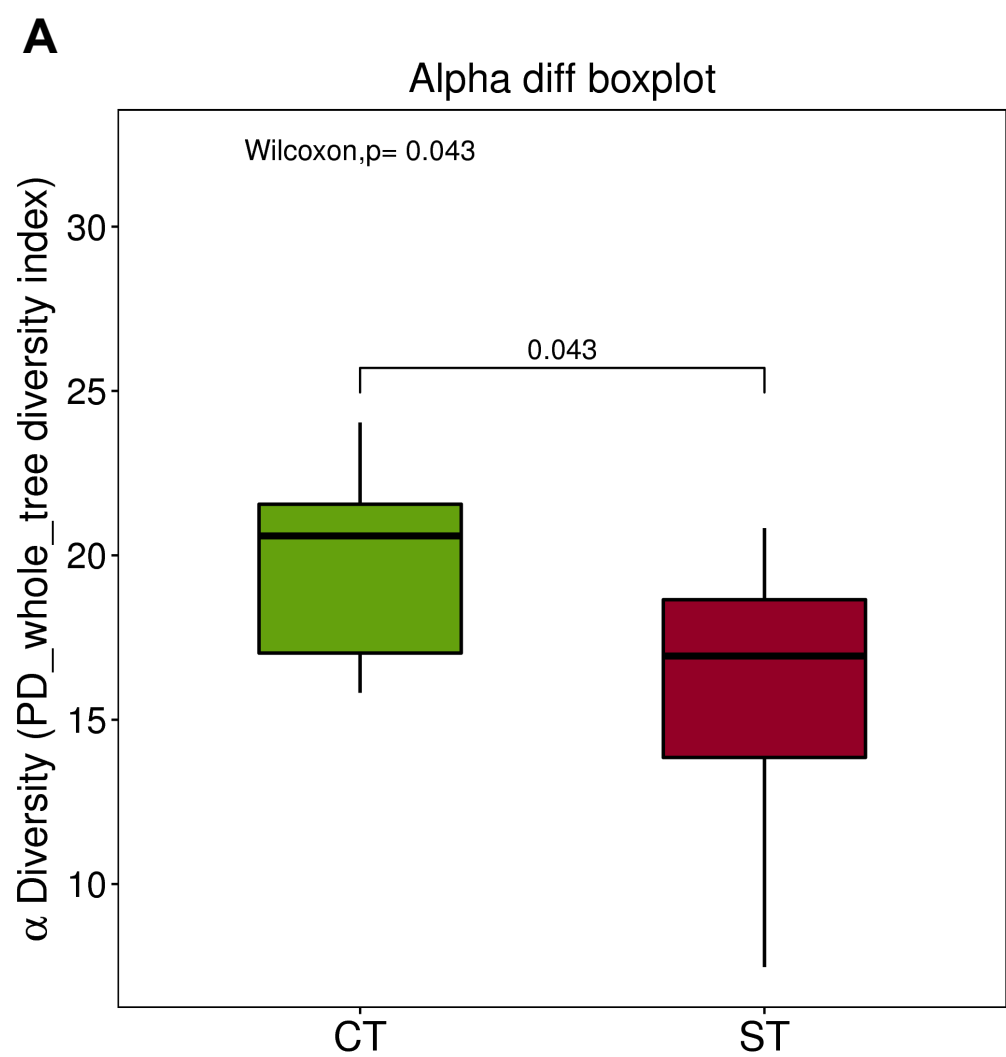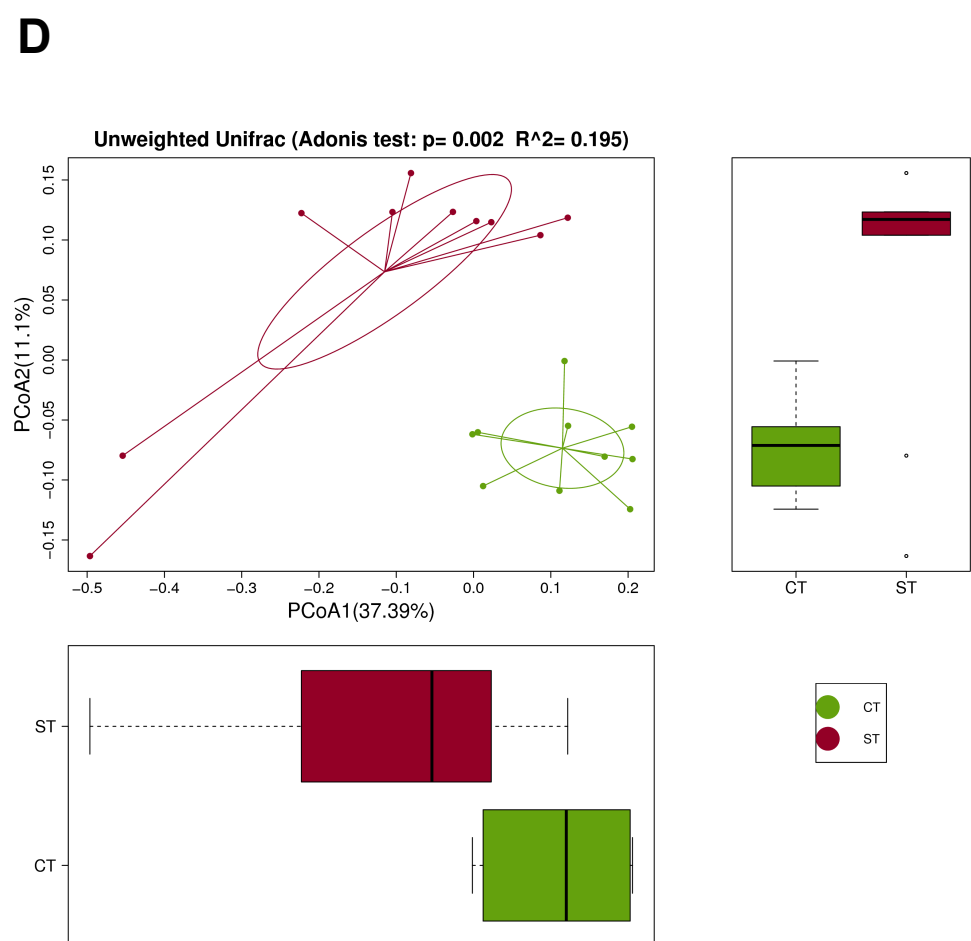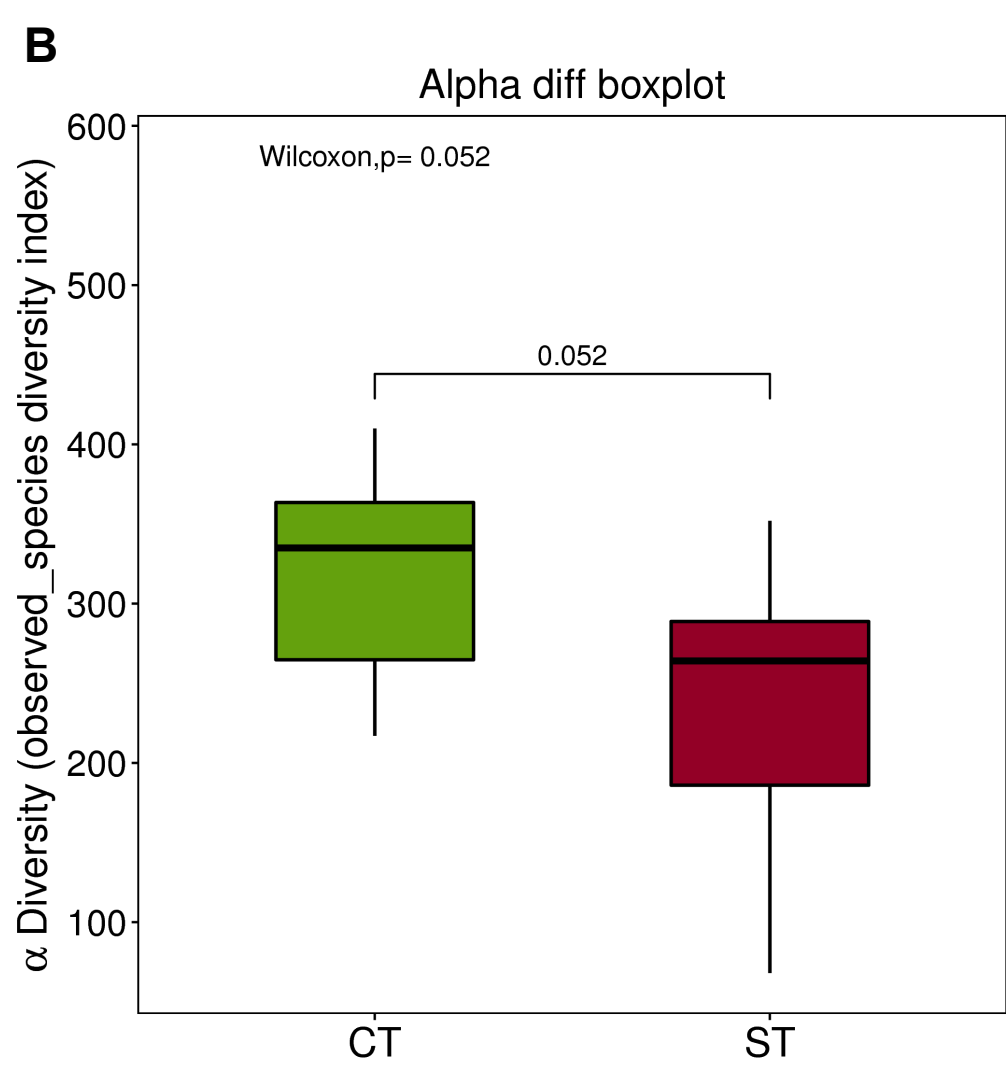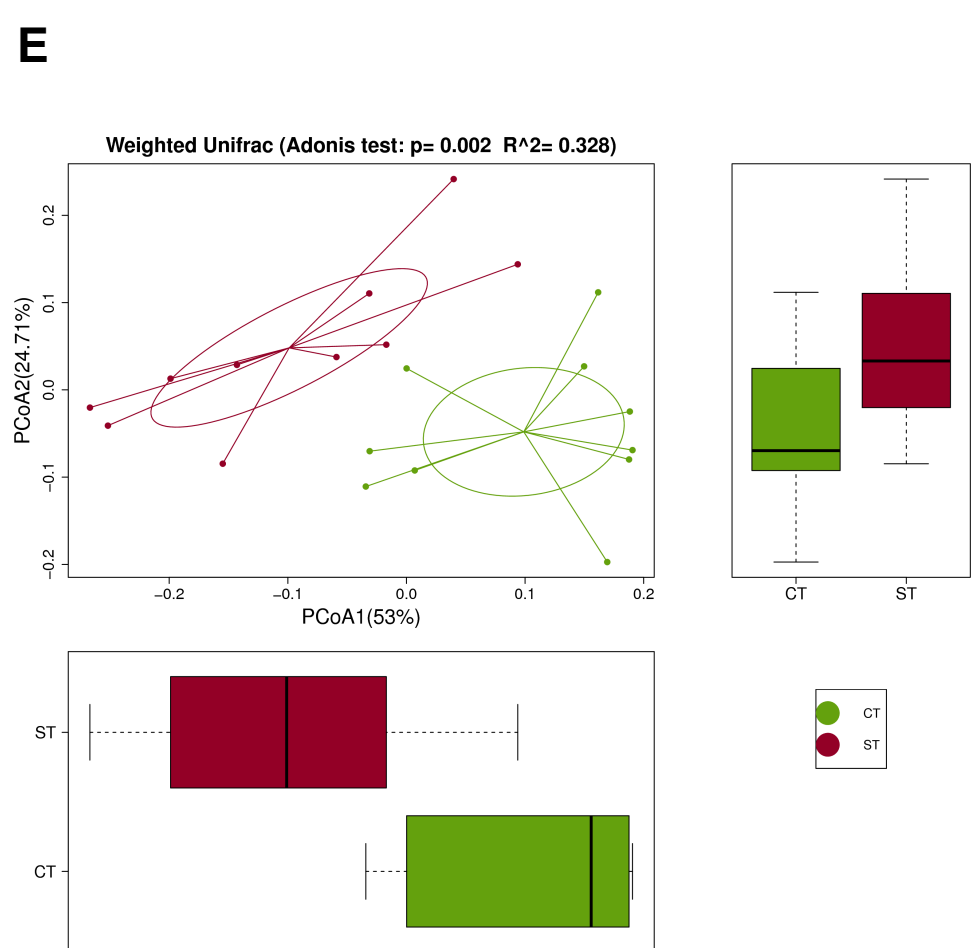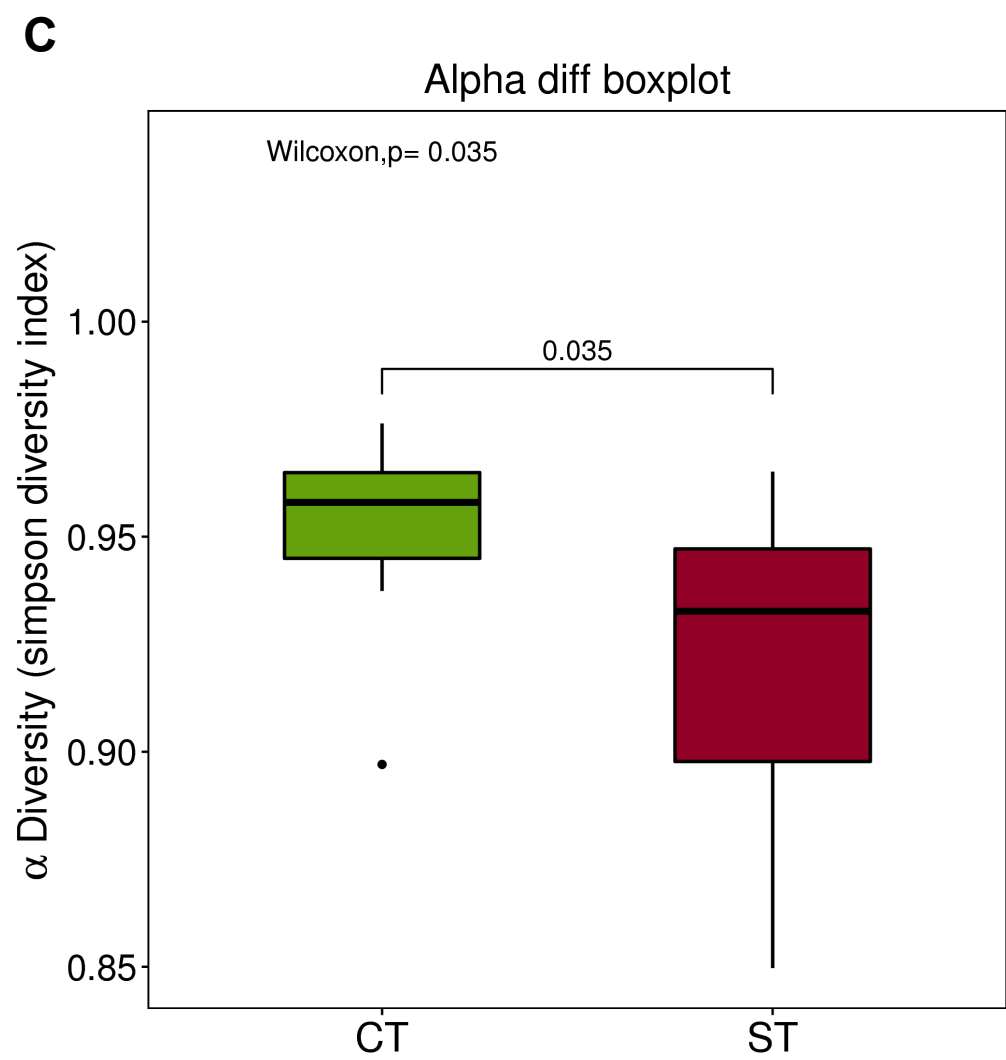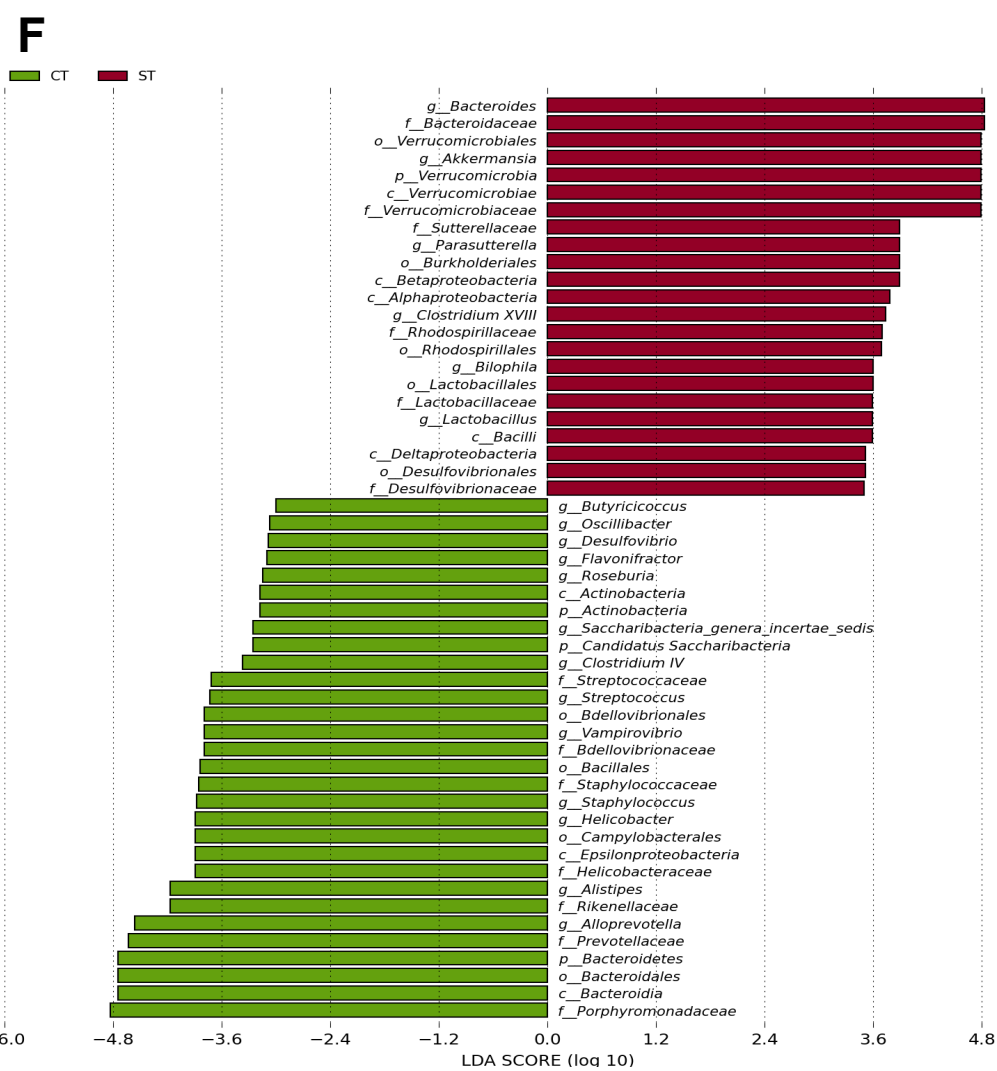

Fig. S5

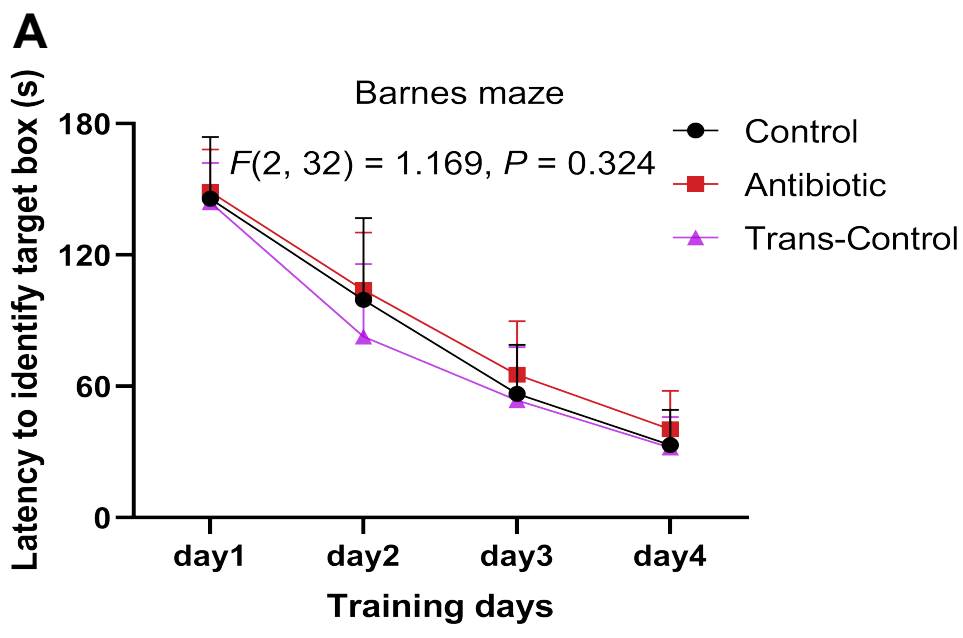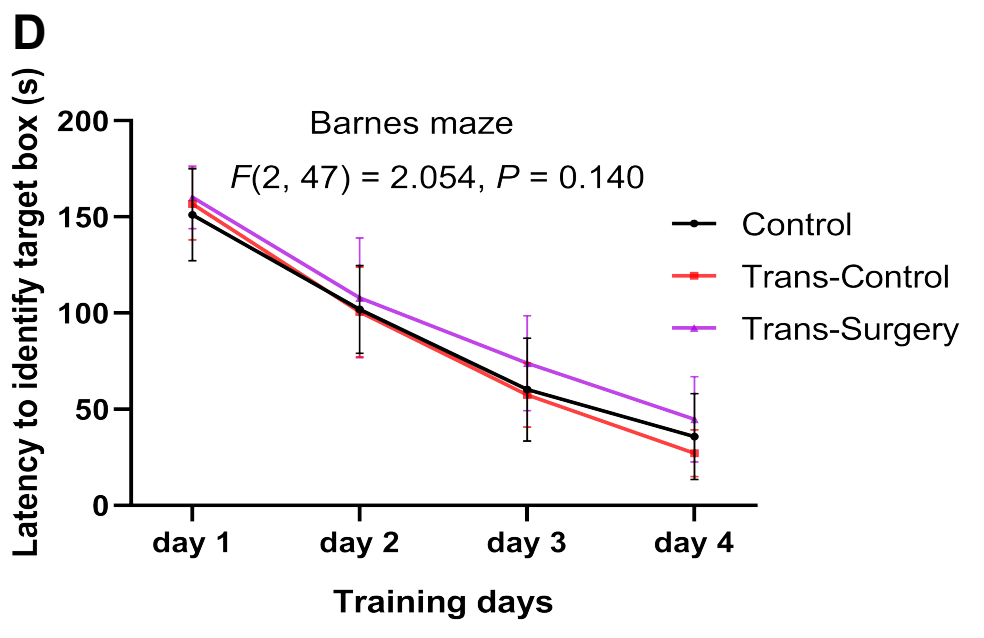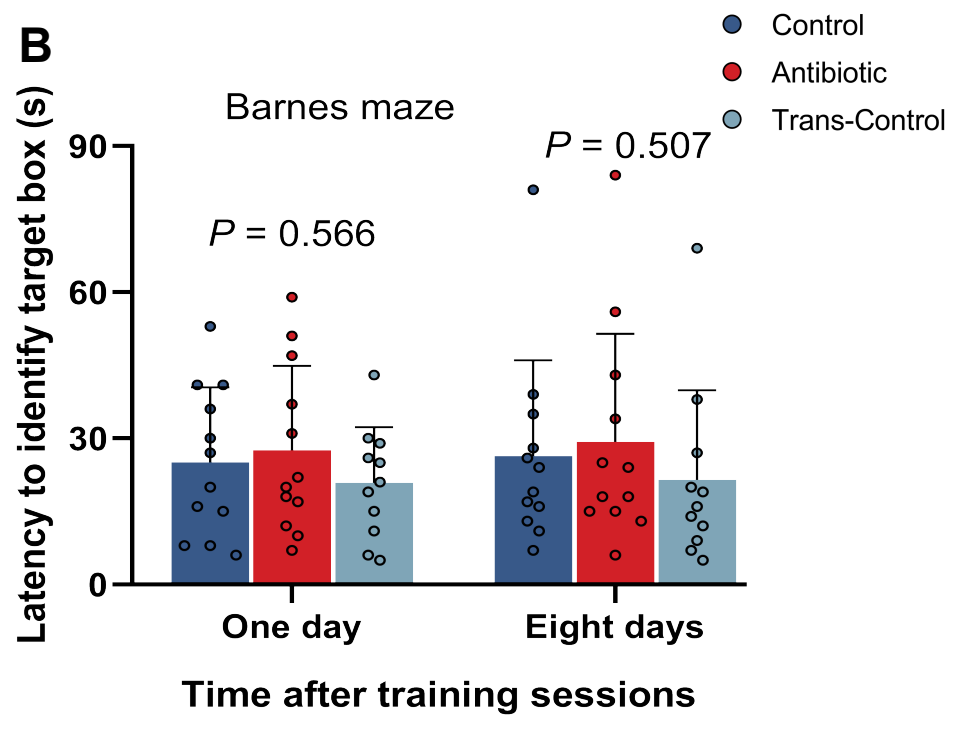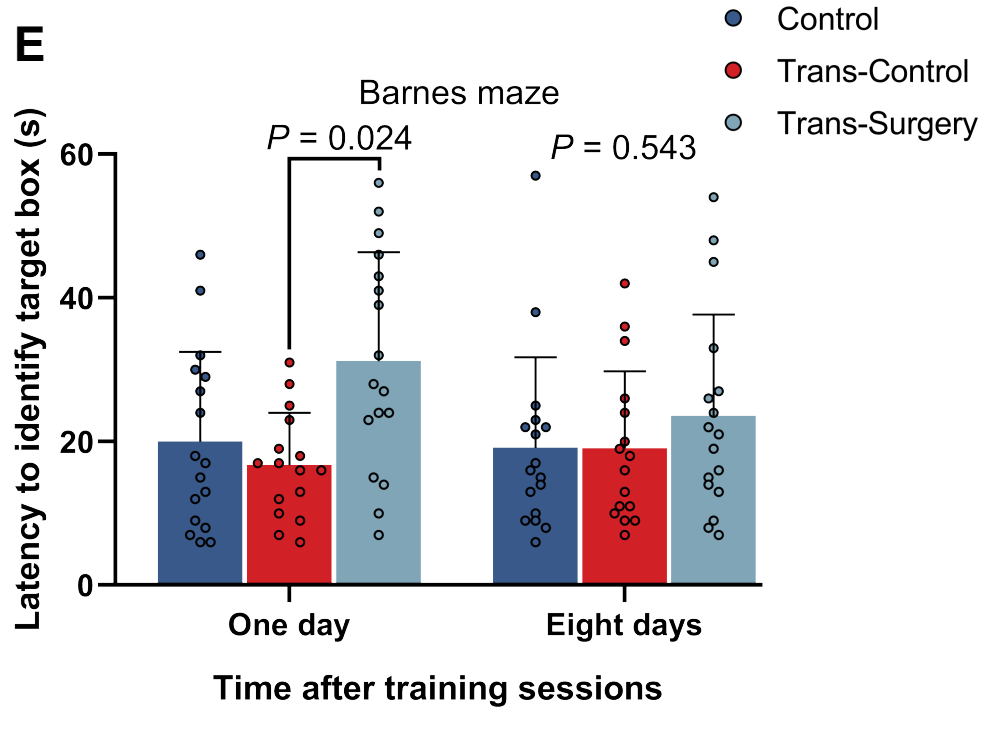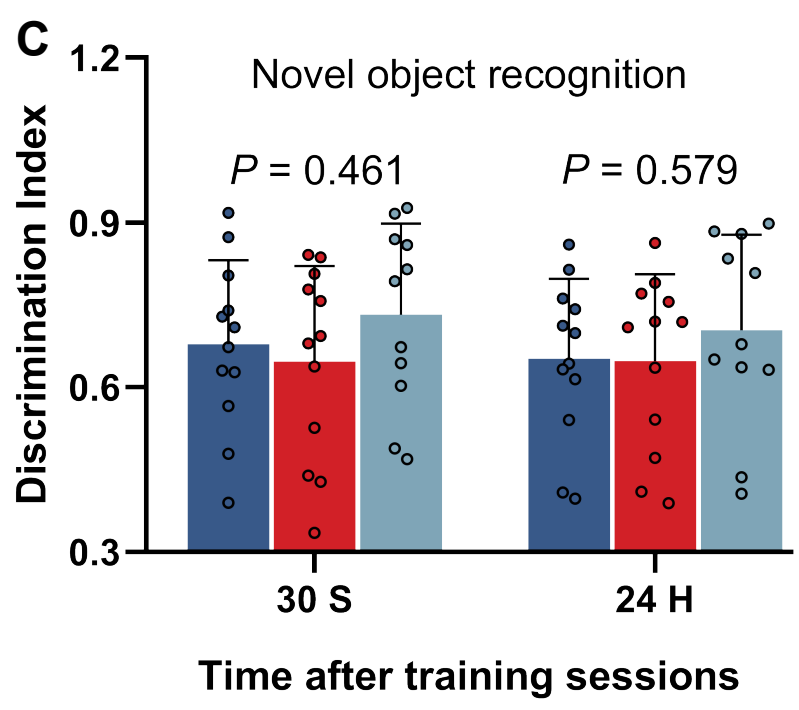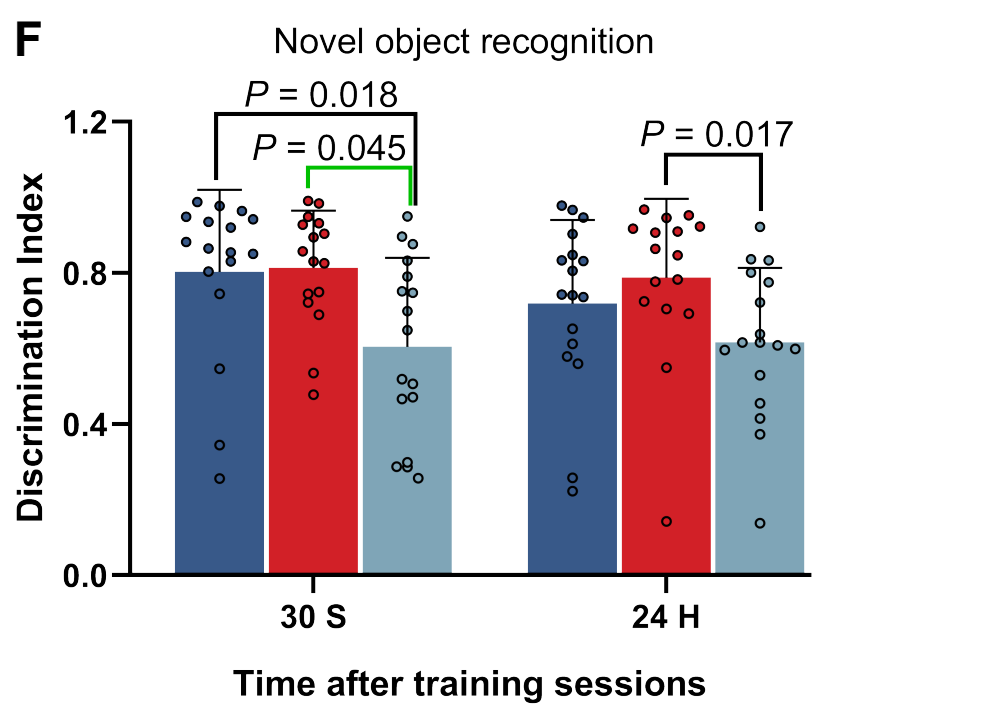

Fig. S6

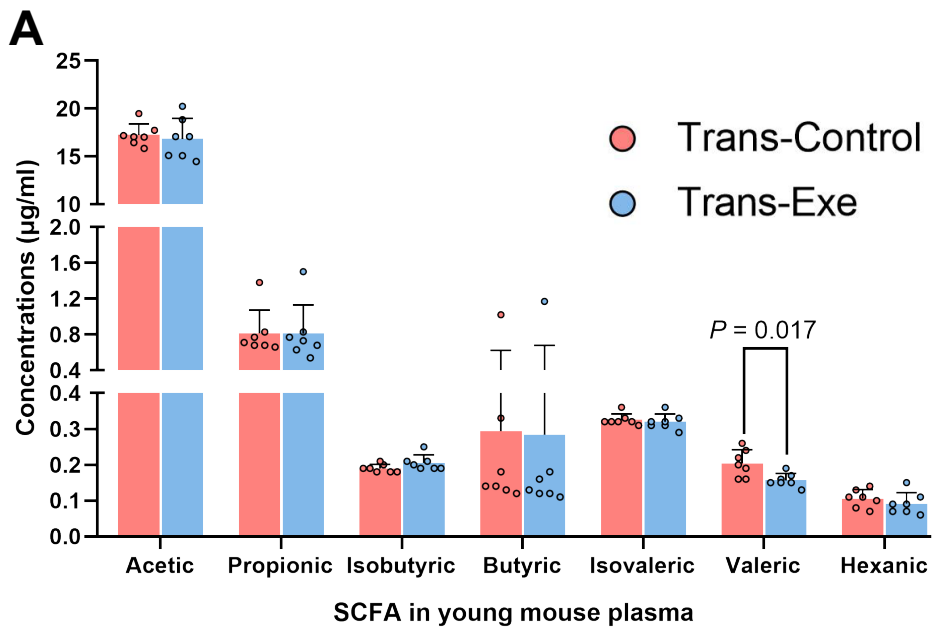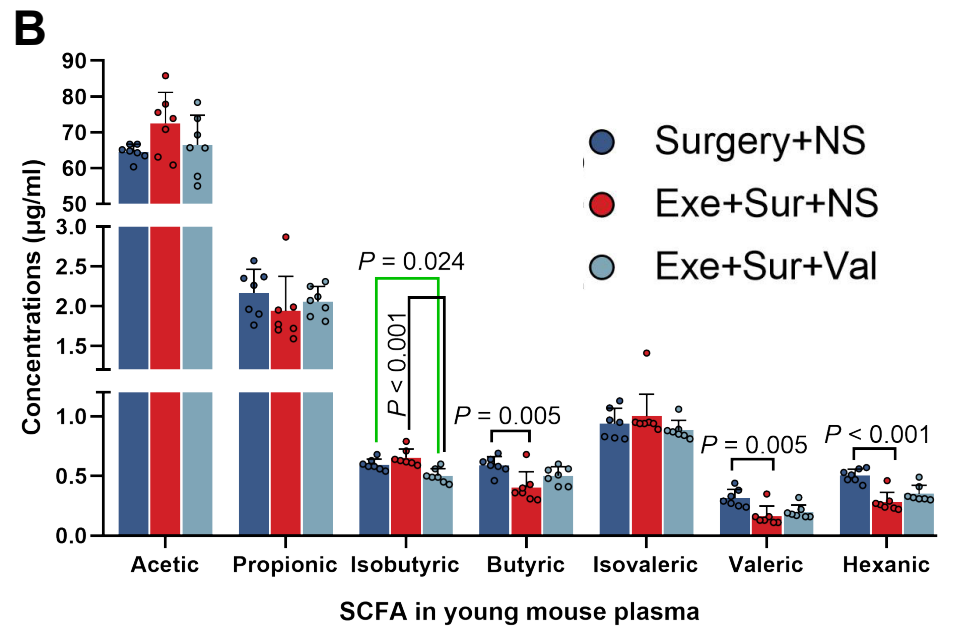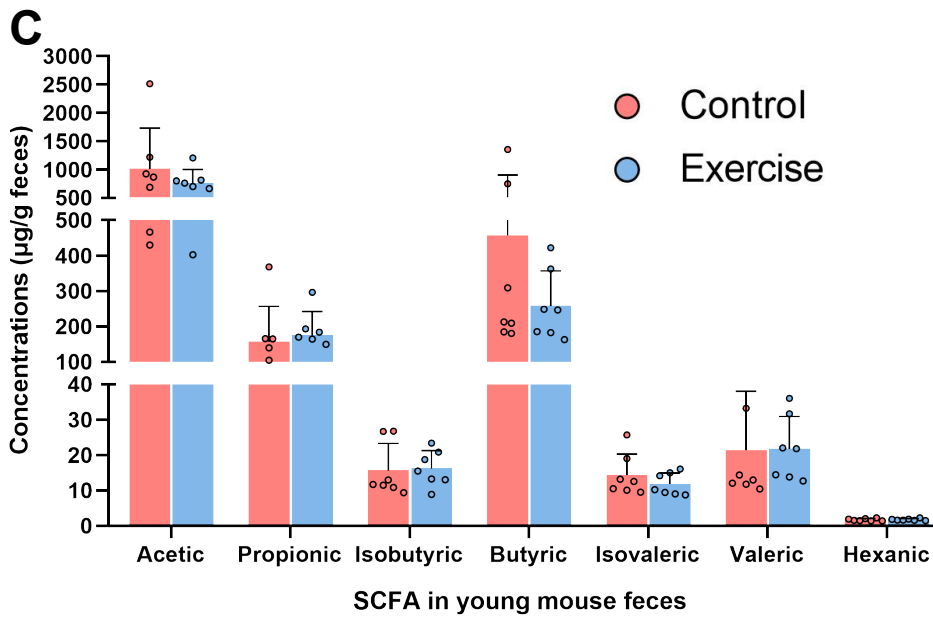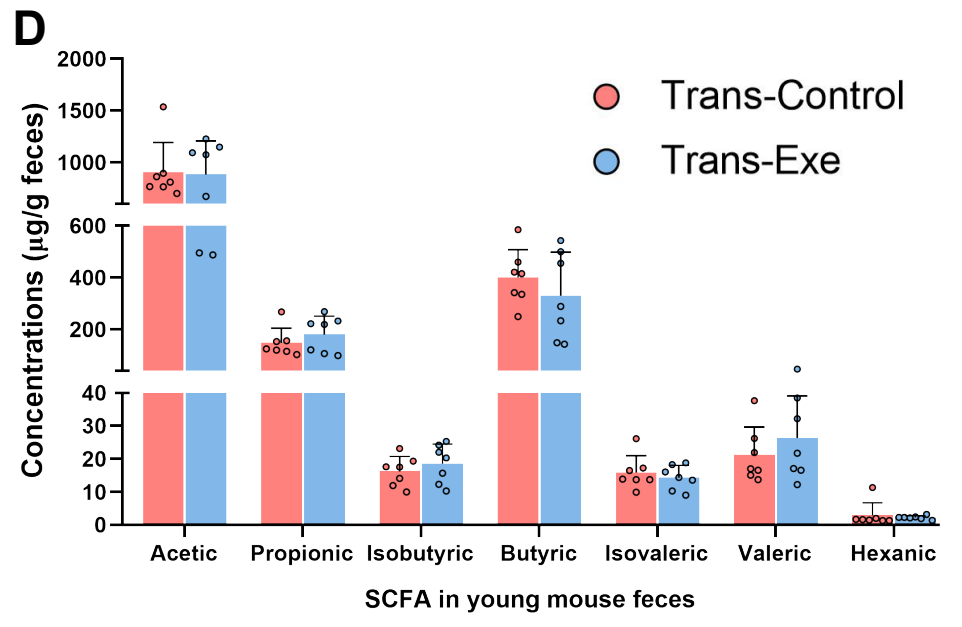

Fig. S7

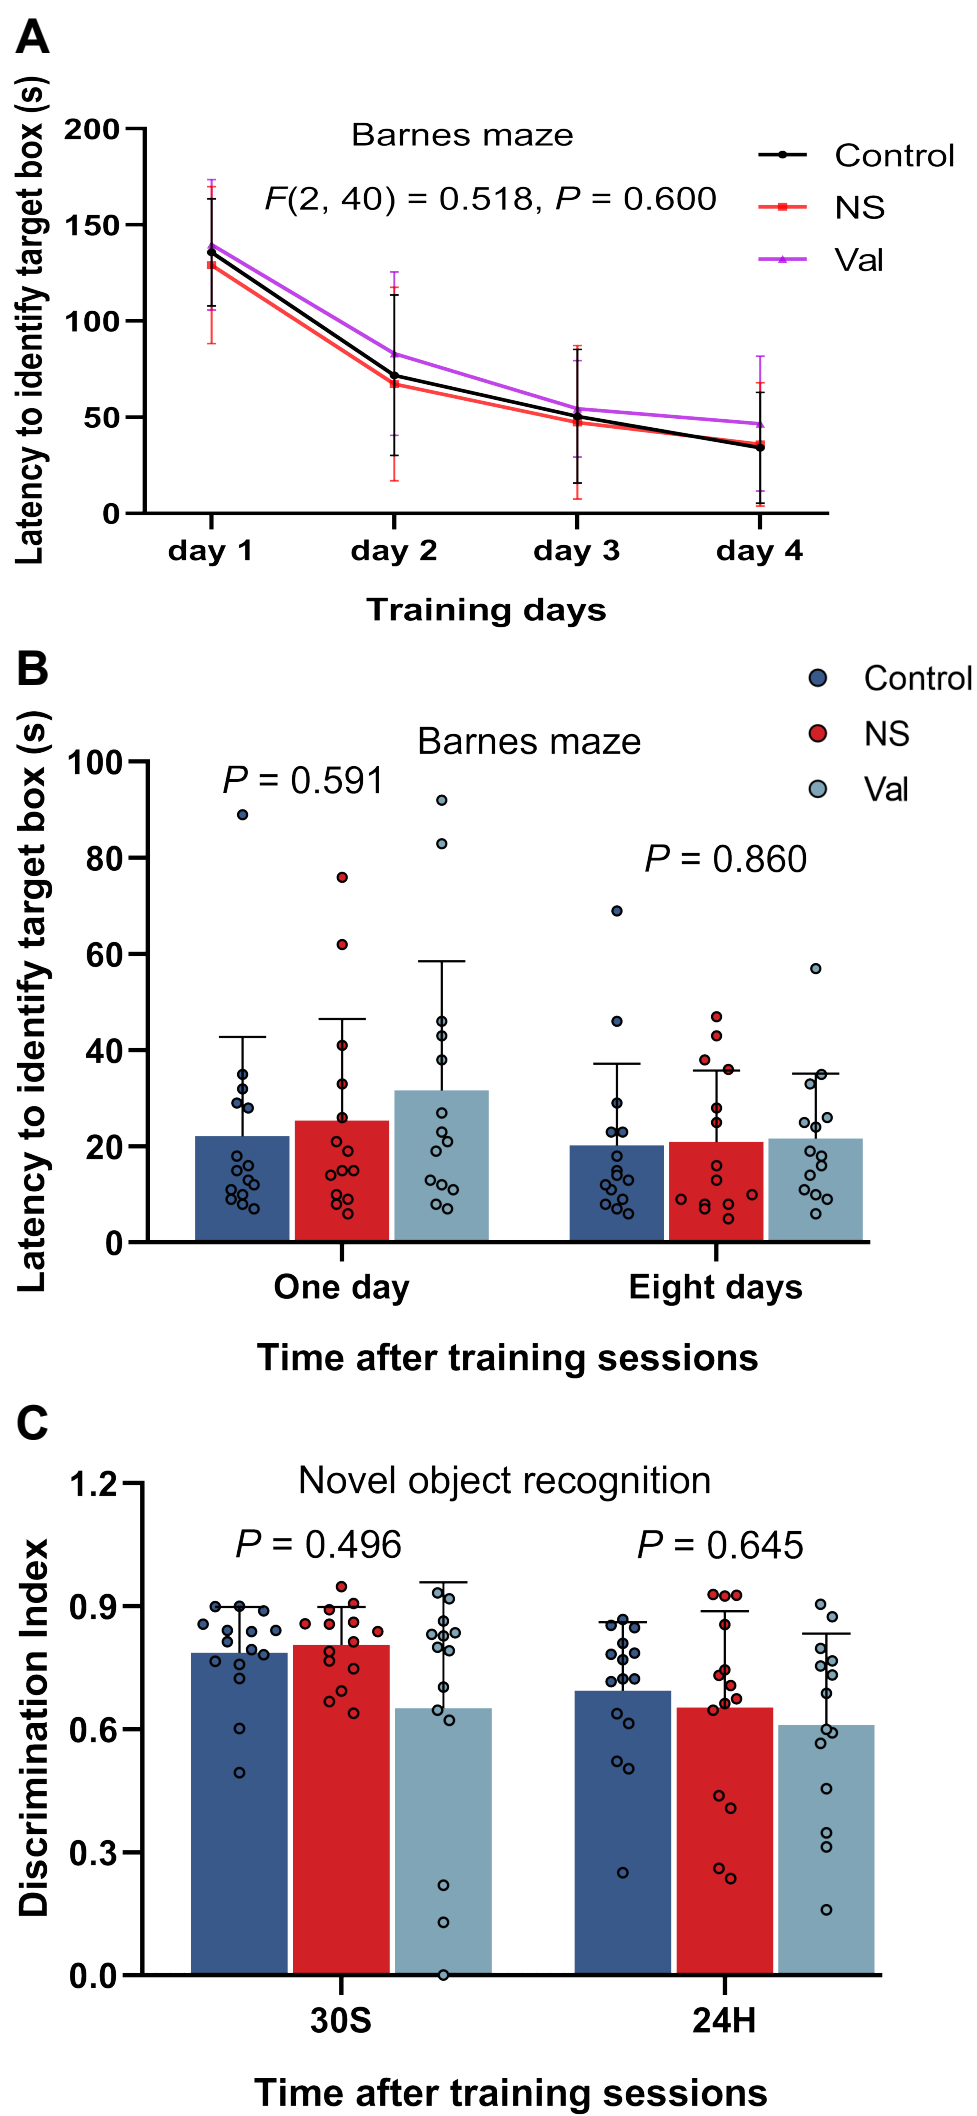

Fig. S8



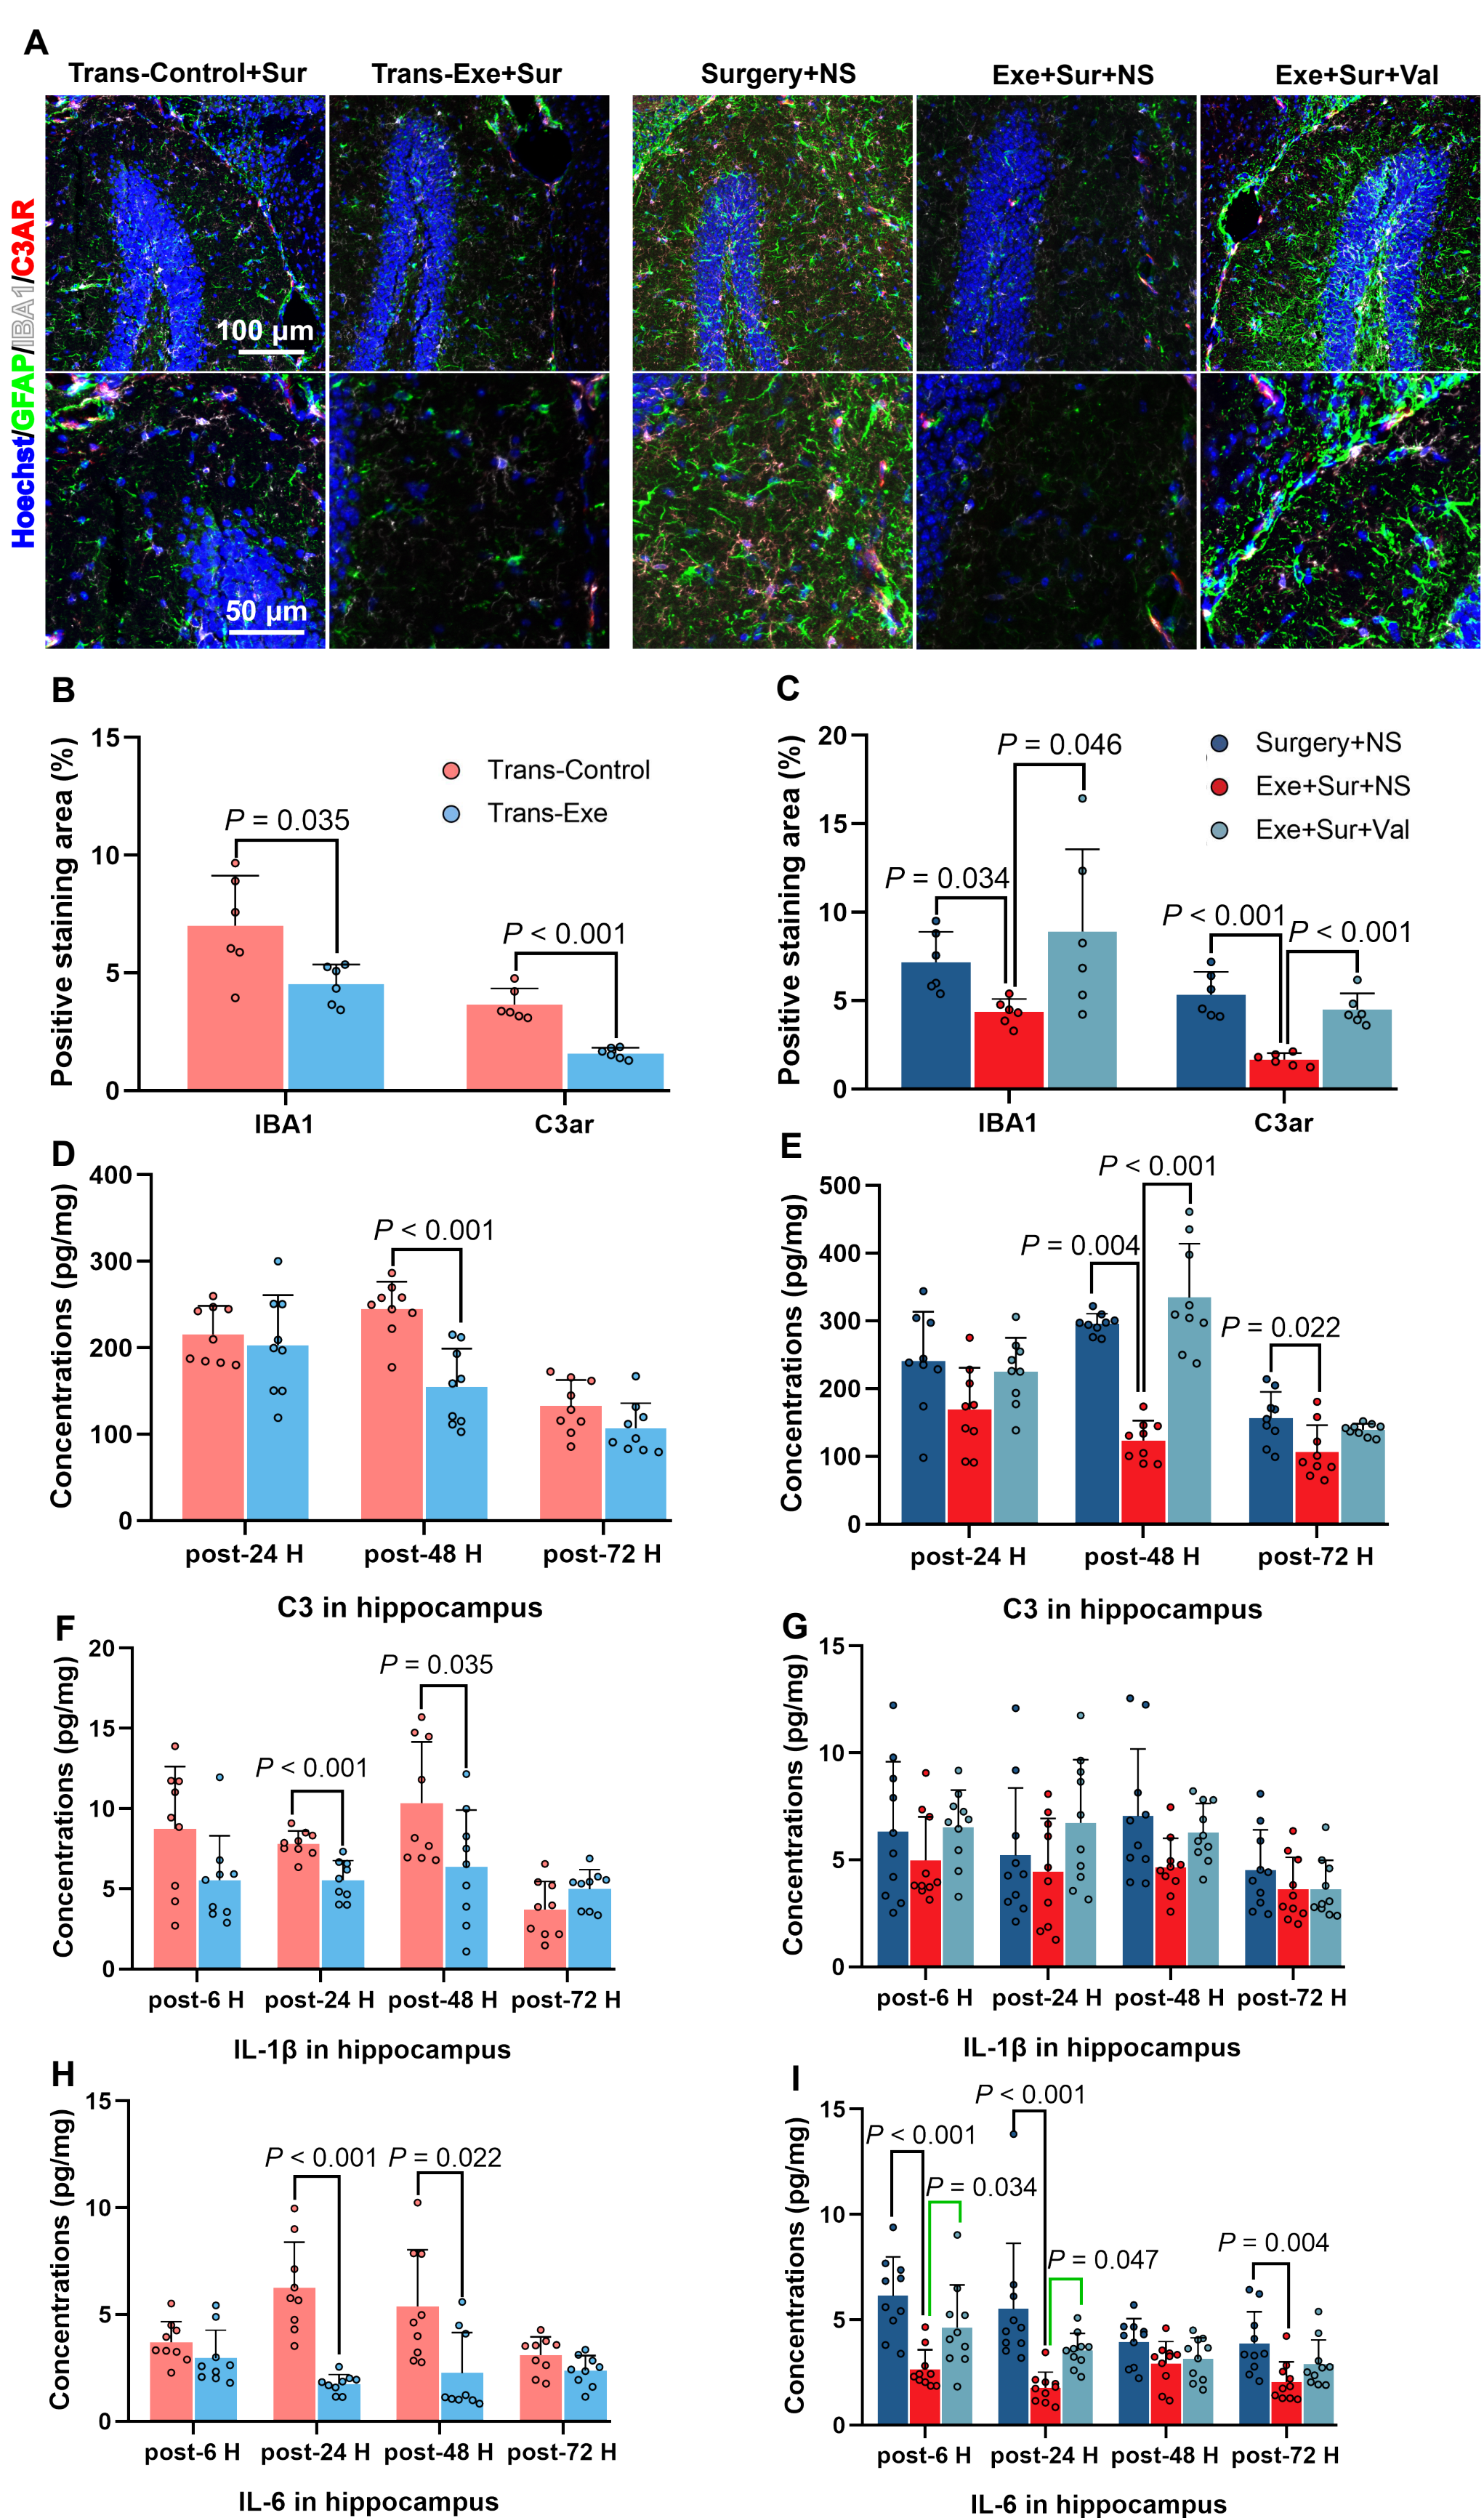

Fig. S9



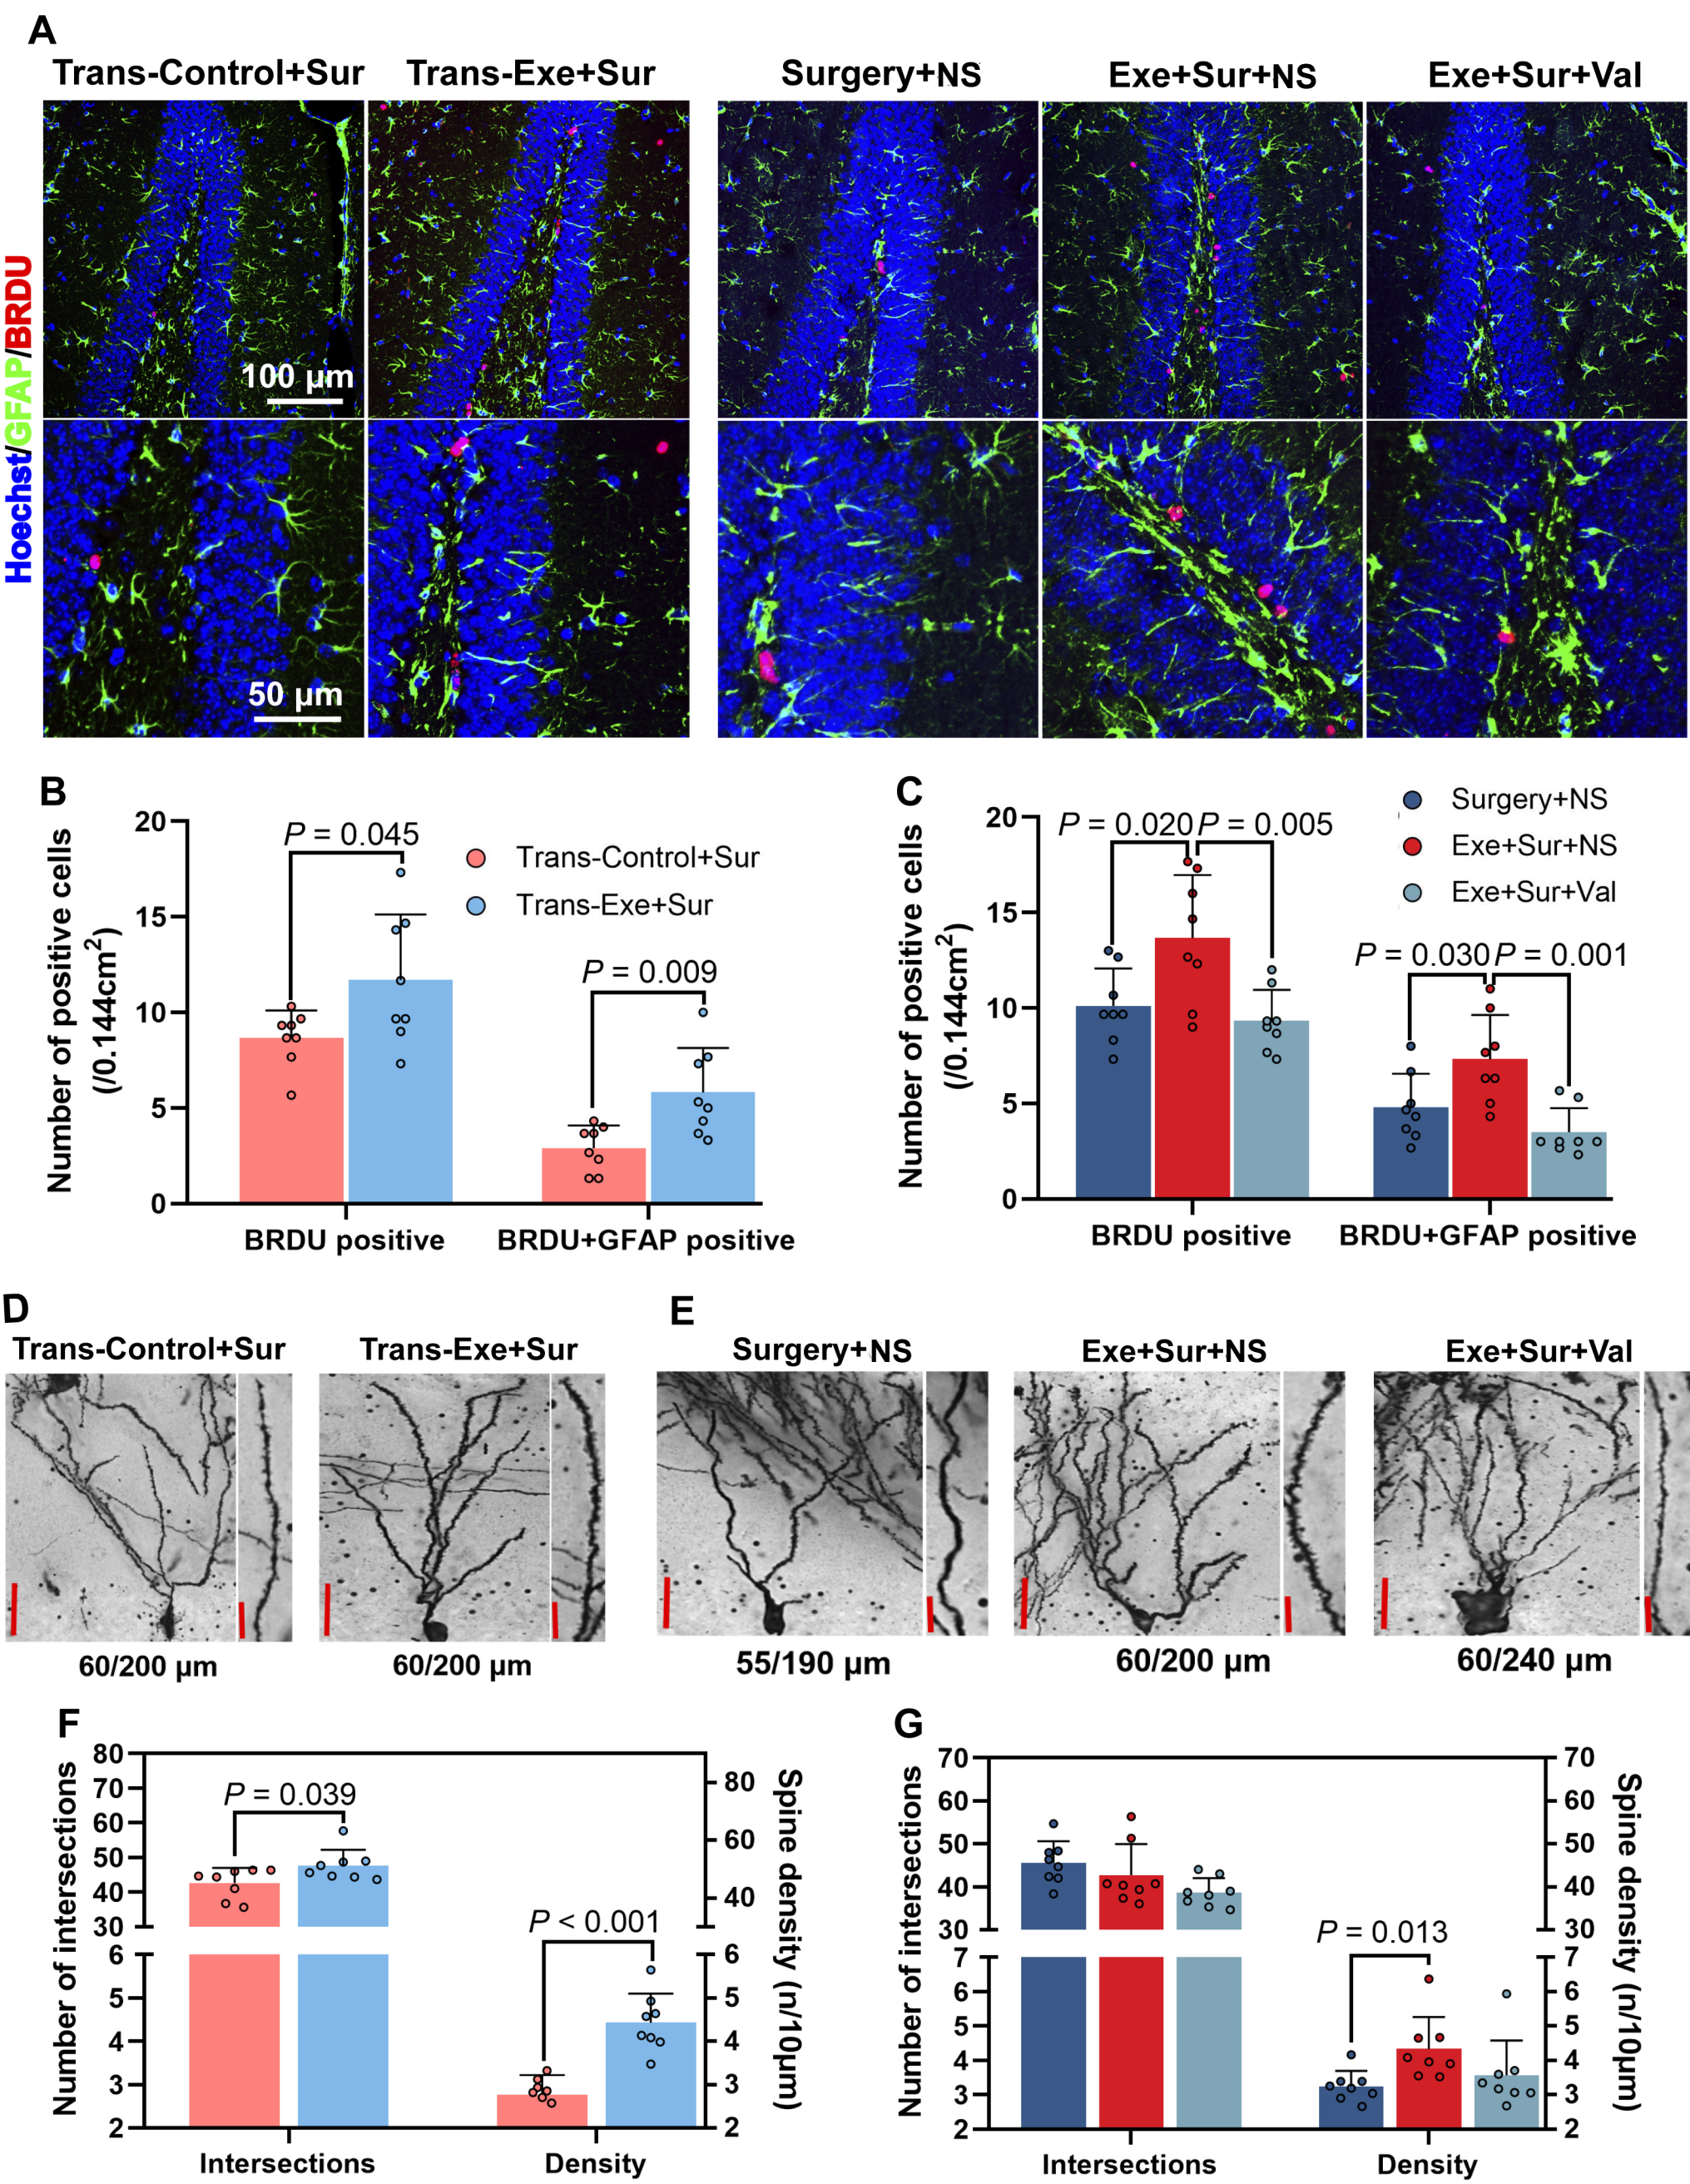

Fig. S10



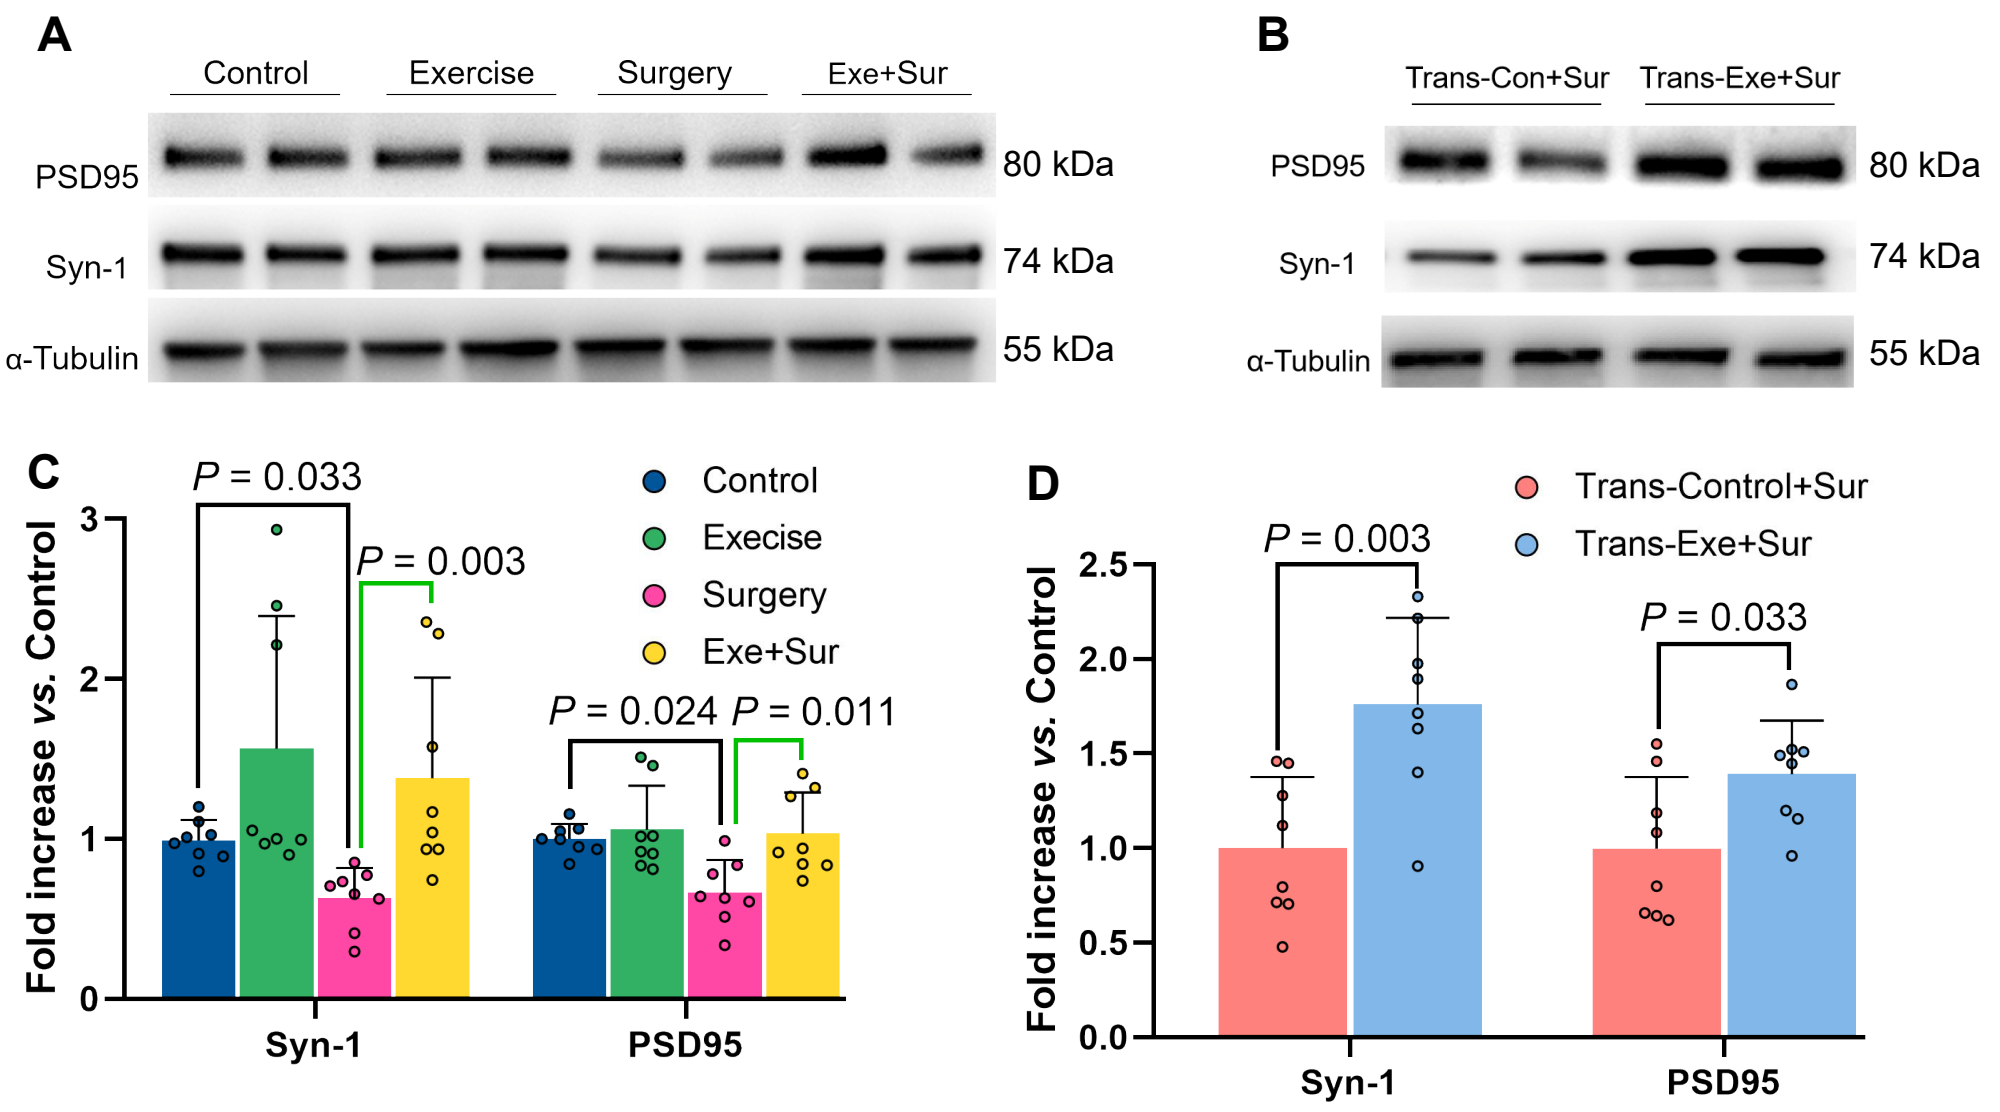

Fig. S11

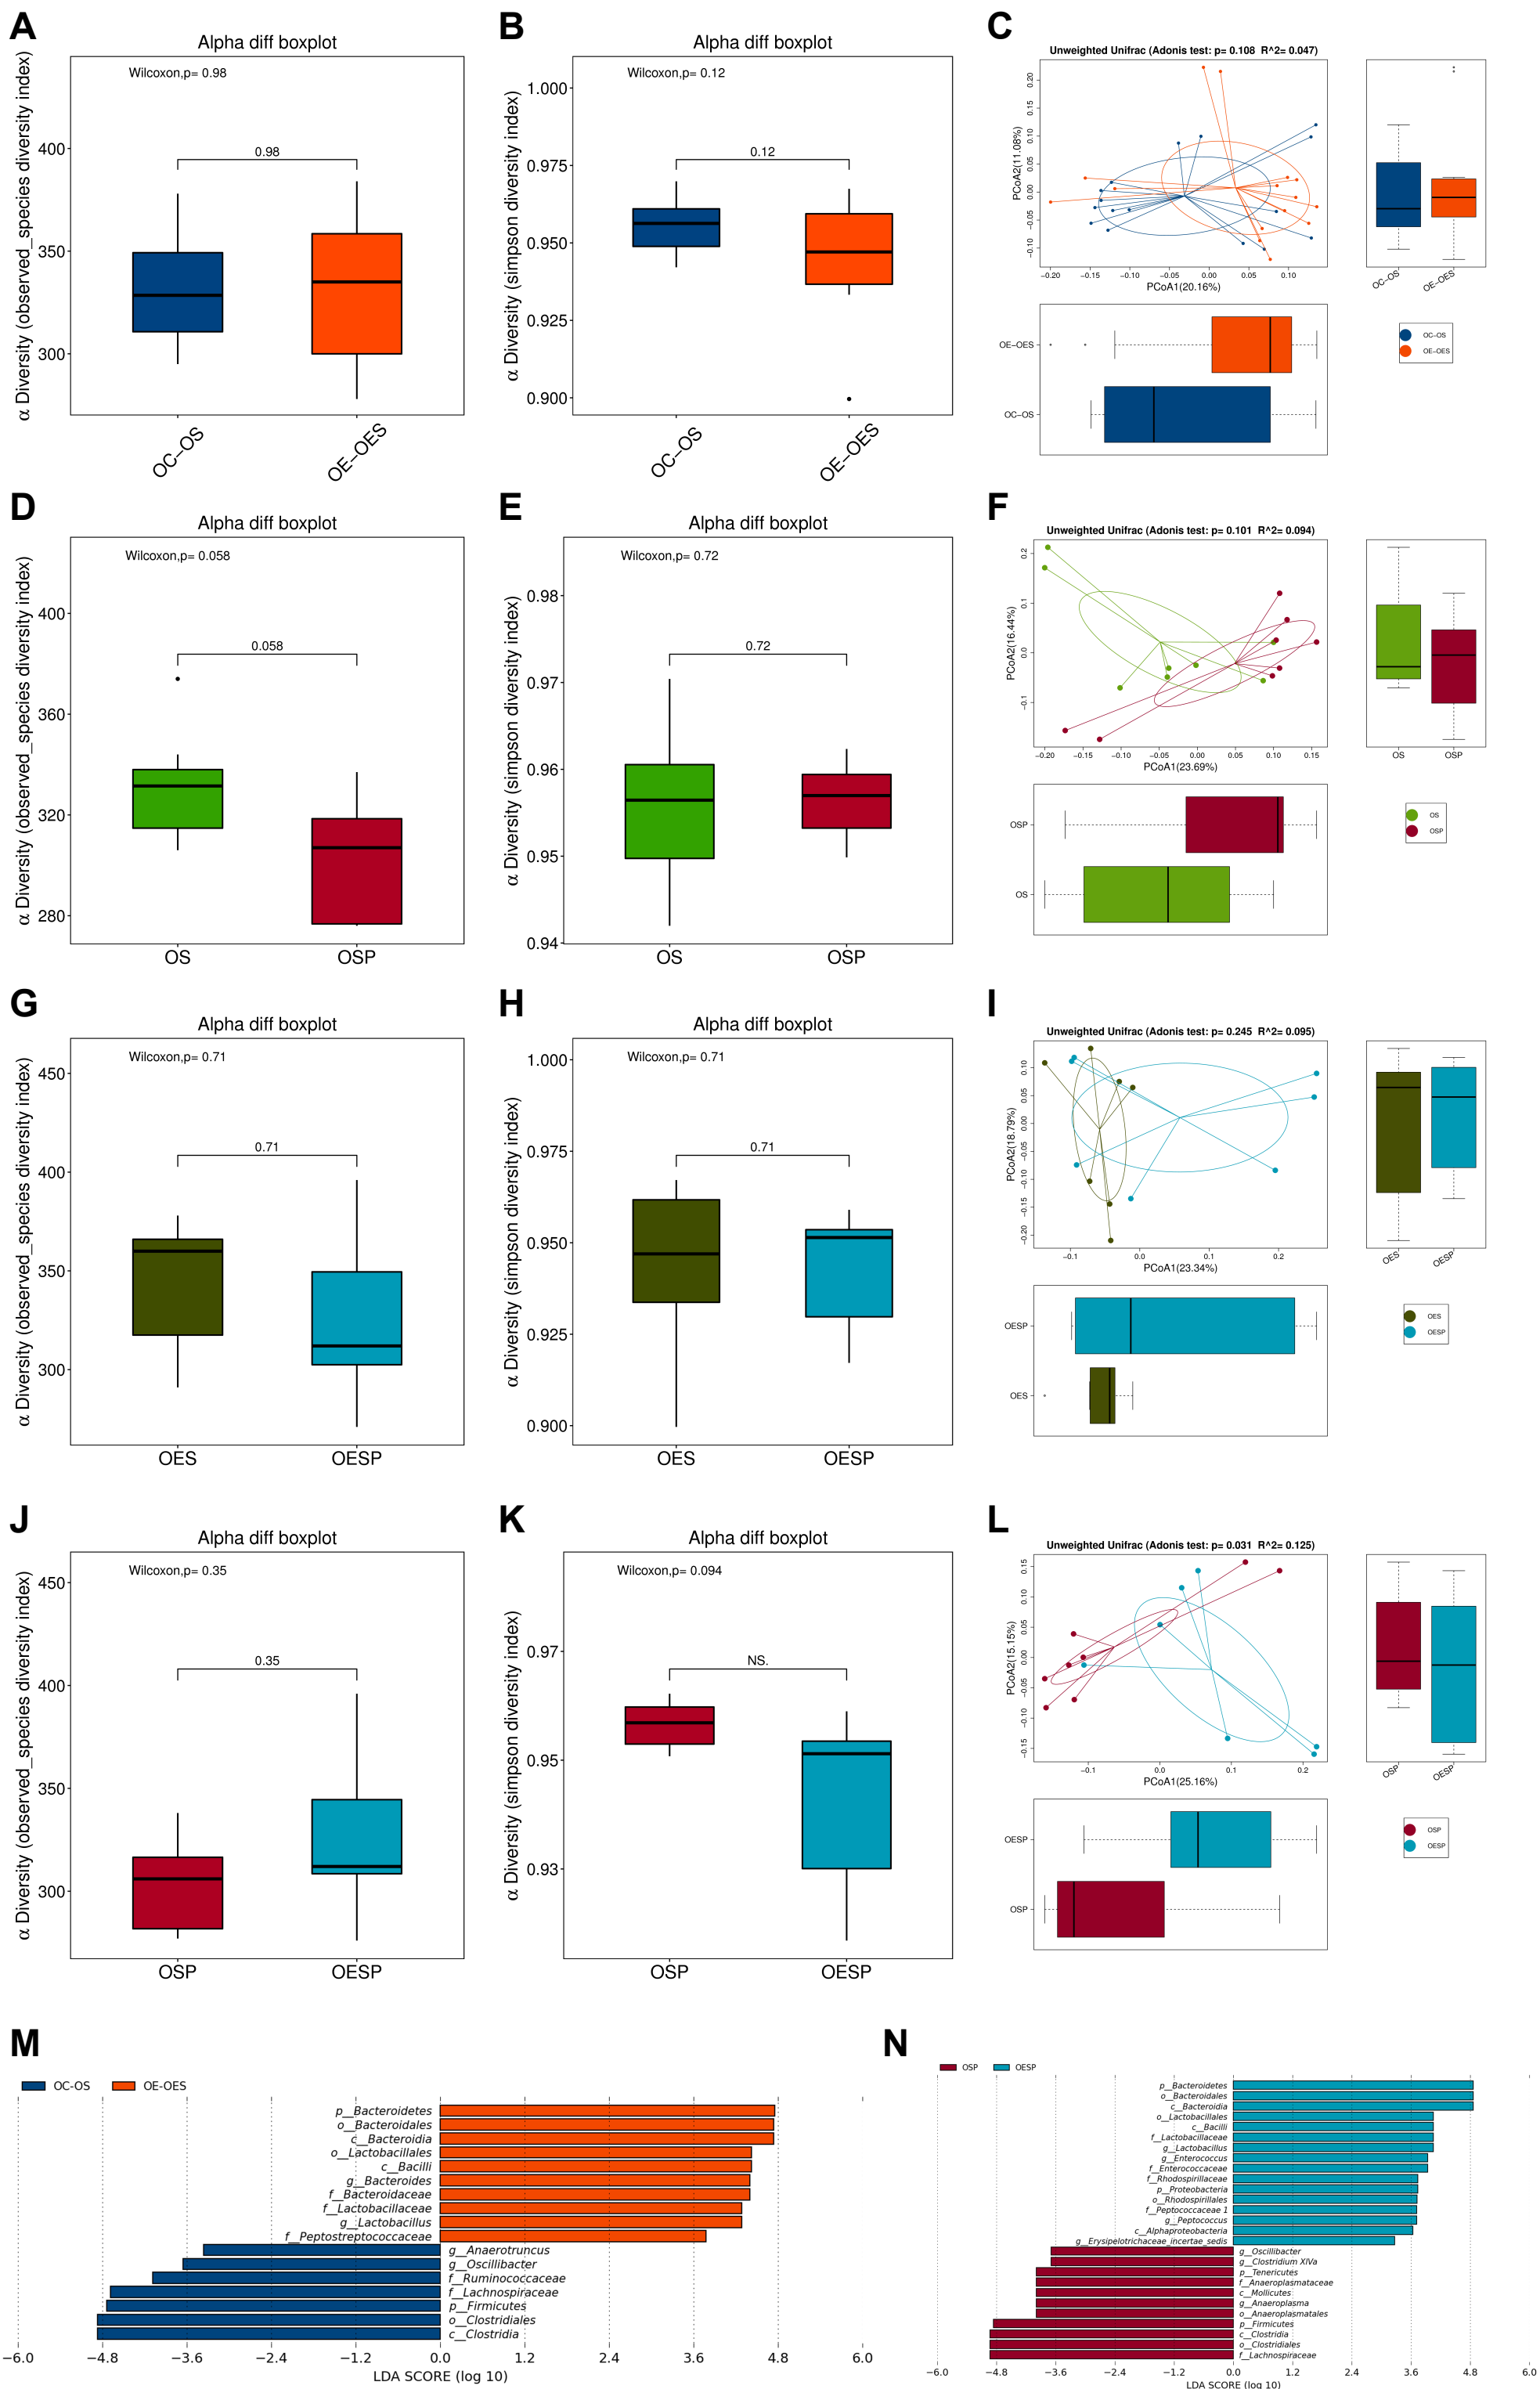

Fig. S12



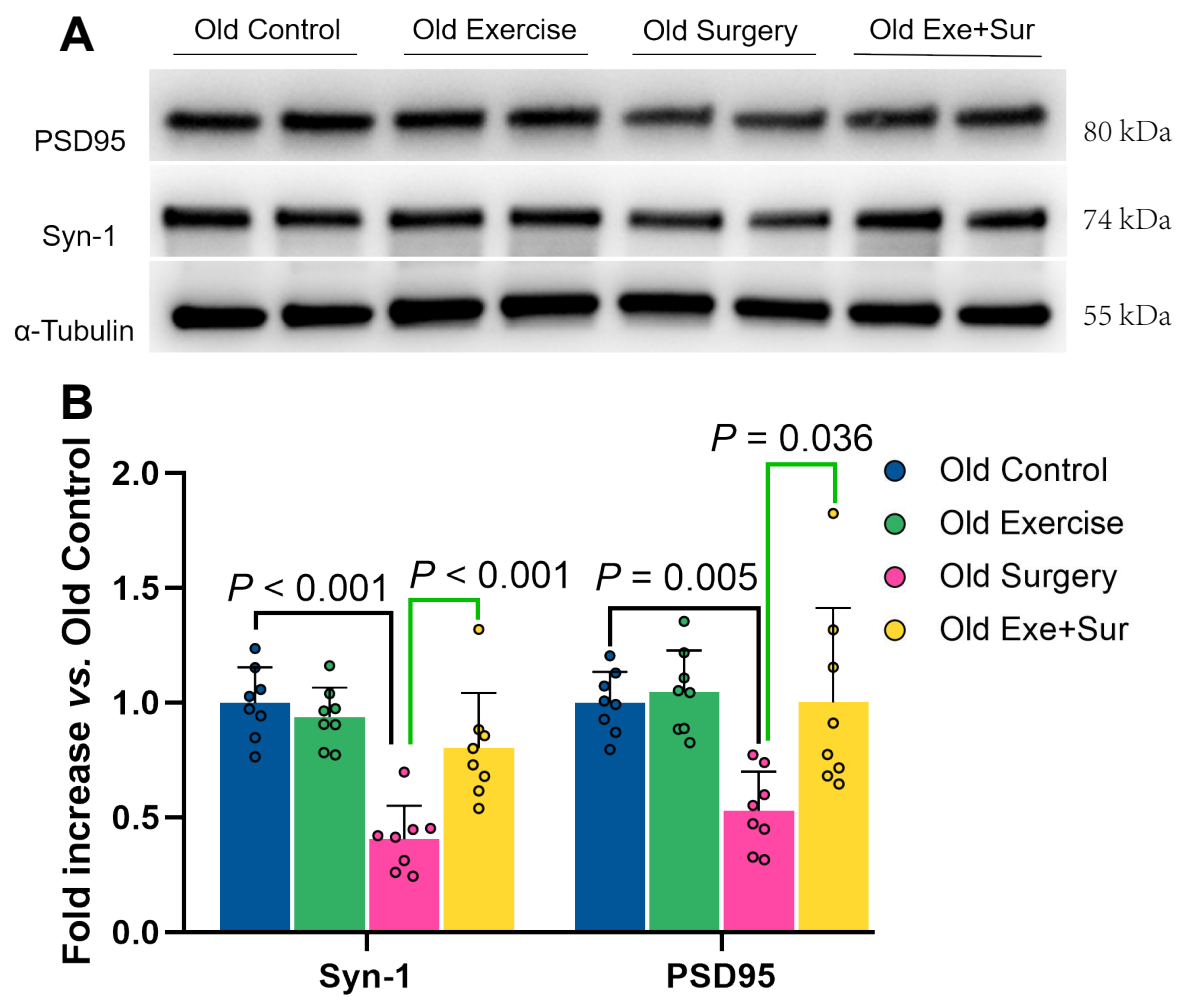

Fig. S13
